# Supplementary material for: The Metabolic Signatures of Surviving Cotwins in Cases of Single Intrauterine Fetal Death During Monochorionic Diamniotic Pregnancy: A Prospective Case-Control Study
Source: Front Mol Biosci. 2022 Apr 8;9:799902. doi: 10.3389/fmolb.2022.799902 (PMC9024353; doi:10.3389/fmolb.2022.799902)
Supplement: Supplementary file 1 [file Table2.XLSX]

## Sheet: Placental Tissue
Supplementary Table 2A. Correlation between fetal growth and metabolites in placental tissue.
	Neonatal Birthweight (g)																Neonatal Birth Length (cm)
	Uncomplicated Singleton Pregnancy (n=8)				Uncomplicated MCDA Twin Pregnancy (n=16)				RFA sIUFD (n=8)				Spontaneous sIUFD (n=8)				Uncomplicated Singleton Pregnancy (n=8)				Uncomplicated MCDA Twin Pregnancy (n=16)				RFA sIUFD (n=8)				Spontaneous sIUFD (n=8)
metabolites	Standardization β	t Value	P value	Sig.	Standardization β	t Value	P value	Sig.	Standardization β	t Value	P value	Sig.	Standardization β	t Value	P value	Sig.	Standardization β	t Value	P value	Sig.	Standardization β	t Value	P value	Sig.	Standardization β	t Value	P value	Sig.	Standardization β	t Value	P value	Sig.
(2E)-Dodecenoyl-CoA	0.4898[-0.7908,1.7705]	1.0619	0.3481		0.2487[-0.2723,0.7754]	1.0569	0.3132			.	.			.	.		0.9508[0.1948,1.7067]	3.492	0.0251	*	0.2866[-0.2359,0.8051]	1.2034	0.2541			.	.			.	.
(3R)-3,19-dihydroxynonadecanoic acid		.	.		-0.3725[-0.8634,0.1183]	-1.6536	0.1241		-0.1765[-0.7722,0.4192]	-0.8225	0.457		-0.3236[-1.0766,0.4295]	-1.1929	0.2988			.	.		-0.5552[-0.9700,-0.1404]	-2.9163	0.0129	*	-0.0700[-0.7143,0.5743]	-0.3018	0.7779		-0.5119[-1.5169,0.4930]	-1.4144	0.2302
(3R,18R)-3,18-dihydroxynonadecanoic acid		.	.			.	.		-0.6261[-0.9744,0.1350]	-2.4078	0.0952		-0.5806[-1.5114,0.3889]	-1.8798	0.1567			.	.			.	.		-0.2481[-1.1015,0.7265]	-0.6528	0.5604		-0.9105[-1.9696,0.3551]	-2.2102	0.1141
(R)-3,4-Dihydro-8-hydroxy-3-tridecyl-1H-2-benzopyran-1-one	-0.5458[-1.7380,0.6465]	-1.271	0.2726		-0.4259[-0.9893,0.1375]	-1.647	0.1255		-0.0665[-0.6350,0.5020]	-0.3247	0.7617		-0.3261[-1.0709,0.4187]	-1.2157	0.291		-0.3884[-1.7686,0.9919]	-0.7812	0.4783		-0.2857[-0.8811,0.3096]	-1.0457	0.3163		-0.1709[-0.7031,0.3613]	-0.8917	0.423		-0.5018[-1.5075,0.5040]	-1.3852	0.2382
(S)-[10]-Gingerol		.	.		-0.3967[-0.9121,0.1188]	-1.6766	0.1195		-0.0723[-0.6505,0.5058]	-0.3474	0.7458		-0.3371[-1.0722,0.3980]	-1.2733	0.2719			.	.		-0.3888[-0.9046,0.1271]	-1.6419	0.1265		-0.1550[-0.7083,0.3983]	-0.7777	0.4802		-0.5115[-1.5076,0.4846]	-1.4257	0.2271
1,2-Di-(9Z,12Z,15Z-octadecatrienoyl)-3-(Galactosyl-alpha-1-6-Galactosyl-beta-1)-glycerol	-0.3335[-1.4822,0.8152]	-0.806	0.4654		-0.0647[-0.6826,0.5532]	-0.2281	0.8234		0.1623[-0.3946,0.7192]	0.809	0.4639		-0.1036[-1.4400,1.2166]	-0.2677	0.8063		-0.1209[-1.4092,1.1674]	-0.2605	0.8074		-0.2270[-0.8275,0.3736]	-0.8235	0.4263		0.1299[-0.4504,0.7103]	0.6216	0.5679		-0.0961[-1.8783,1.6709]	-0.186	0.8643
12-Hydroxy-12-octadecanoylcarnitine	-0.0237[-1.2185,1.1711]	-0.0551	0.9587			.	.		0.2579[-0.2121,0.7279]	1.5235	0.2023		-0.6678[-1.0508,-0.3901]	-6.9412	0.0061	*	-0.4571[-1.5385,0.6243]	-1.1736	0.3057			.	.		0.0692[-0.5208,0.6592]	0.3255	0.7611		-0.8812[-1.4304,-0.4714]	-6.3109	0.008	*
15-methyl-15S-PGE1		.	.		-0.4423[-0.9861,0.1016]	-1.7718	0.1018		-0.1099[-0.6750,0.4553]	-0.5397	0.618		-0.3193[-1.0703,0.4318]	-1.1803	0.3033			.	.		-0.4462[-0.9866,0.0942]	-1.7989	0.0972		-0.1538[-0.7062,0.3986]	-0.773	0.4827		-0.4983[-1.5082,0.5117]	-1.3698	0.2426
1-Phenyl-1,3-docosanedione	-0.2795[-1.4240,0.8651]	-0.6779	0.535		-0.0887[-0.5771,0.3976]	-0.4054	0.693			.	.			.	.		-0.6334[-1.5466,0.2799]	-1.9255	0.1265		-0.2637[-0.7248,0.2011]	-1.2447	0.2391			.	.			.	.
1-Phenyl-1,3-octadecanedione	-0.4933[-1.5667,0.5802]	-1.2758	0.2711		-0.3388[-0.7948,0.1095]	-1.668	0.1235			.	.			.	.		-0.3090[-1.5739,0.9559]	-0.6782	0.5348		-0.4402[-0.8562,-0.0180]	-2.2957	0.0424	*		.	.			.	.
25-hydroxy-3-deoxy-2-oxavitamin D3 / 25-hydroxy-3-deoxy-2-oxacholecalciferol	-0.2235[-1.4482,1.0012]	-0.5068	0.639		-0.2706[-0.7347,0.1872]	-1.3071	0.2178			.	.			.	.		-0.4771[-1.6251,0.6709]	-1.1538	0.3128		-0.1870[-0.6692,0.2978]	-0.8453	0.416			.	.			.	.
2-Hydroxyhexadecanoylcarnitine	0.3263[-0.7991,1.4517]	0.805	0.4659		0.1097[-0.5384,0.7579]	0.3689	0.7186		0.2698[-0.1393,0.6788]	1.831	0.1411		-0.6643[-1.2959,-0.1375]	-3.9382	0.0292	*	-0.0158[-1.2882,1.2566]	-0.0345	0.9741		0.2027[-0.4344,0.8399]	0.6934	0.5013		0.1196[-0.4163,0.6556]	0.6199	0.5689		-0.8290[-1.8683,0.0793]	-2.9234	0.0613
2-O-palmitoyl-3-O-[(2E,4S,6S,8S,10S)-2,4,6,8,10-pentamethylhexacos-2-enoyl]-2'-O-sulfo-alpha,alpha-trehalose	0.0830[-1.4030,1.5691]	0.1551	0.8842		-0.1477[-0.6622,0.3634]	-0.6412	0.5345			.	.			.	.		-0.1932[-1.7336,1.3472]	-0.3482	0.7452		-0.3520[-0.8217,0.1226]	-1.6296	0.1315			.	.			.	.
35S-Methylokadaic acid 7-hexadecanoate	0.5569[-0.5831,1.6969]	1.3563	0.2465		-0.3472[-1.0565,0.3621]	-1.0666	0.3071			.	.			.	.		0.4116[-0.9156,1.7387]	0.861	0.4378		-0.3098[-1.0235,0.4039]	-0.9459	0.3629			.	.			.	.
3a,7a,12a-Trihydroxy-5b-cholestan-26-al	-0.3945[-1.4606,0.6717]	-1.0273	0.3624		-0.1794[-0.6659,0.3030]	-0.8243	0.4273			.	.			.	.		-0.6287[-1.5337,0.2763]	-1.9288	0.126		-0.1355[-0.6293,0.3602]	-0.5986	0.5616			.	.			.	.
3-Hydroxy-11Z-octadecenoylcarnitine	0.3060[-0.8867,1.4986]	0.7123	0.5156		0.2434[-0.3151,0.8019]	0.9496	0.3611		0.2474[-0.2191,0.7139]	1.4725	0.2149		-0.7174[-1.1177,-0.4304]	-7.1674	0.0056	*	-0.0677[-1.3924,1.2571]	-0.1418	0.8941		0.2835[-0.2656,0.8325]	1.1249	0.2826		0.1701[-0.3663,0.7064]	0.8803	0.4284		-0.9221[-1.6528,-0.3372]	-4.8141	0.0171	*
9,12-Hexadecadienoylcarnitine		.	.		0.0058[-0.6359,0.6475]	0.0196	0.9847		0.2097[-0.5976,1.0208]	0.8322	0.4664		0.0758[-1.0070,1.1586]	0.1943	0.8554			.	.		0.1029[-0.5335,0.7393]	0.3524	0.7306		0.3816[-0.2793,0.9827]	1.7737	0.1742		-0.0763[-1.5998,1.4472]	-0.1391	0.8961
9'-Carboxy-gamma-chromanol	-0.5599[-1.7795,0.6597]	-1.2746	0.2715		-0.1814[-0.7387,0.3718]	-0.7273	0.4822			.	.			.	.		-0.8797[-1.7799,0.0205]	-2.7133	0.0534		0.0239[-0.5485,0.5960]	0.0913	0.9289			.	.			.	.
All trans decaprenyl diphosphate	0.0150[-1.6727,1.7027]	0.0247	0.9815		0.1475[-0.4136,0.7087]	0.5729	0.5773		0.3468[0.0745,0.6191]	3.5366	0.0241	*	0.4550[-1.0831,2.0650]	0.9926	0.3941		-0.5837[-2.1580,0.9905]	-1.0295	0.3614		0.0712[-0.4940,0.6365]	0.2746	0.7883		0.0704[-0.4806,0.6214]	0.3548	0.7407		0.7313[-1.1350,2.7132]	1.3051	0.2829
all-trans-Decaprenyl diphosphate	0.5200[-0.6382,1.6782]	1.2466	0.2806		-0.1050[-0.7157,0.5057]	-0.3746	0.7145		0.1727[-0.3700,0.7155]	0.8836	0.4268		-0.1605[-1.4626,1.1163]	-0.4274	0.6979		0.4096[-0.9042,1.7235]	0.8656	0.4355		-0.3368[-0.9114,0.2377]	-1.2774	0.2256		0.1390[-0.4294,0.7074]	0.679	0.5344		-0.1742[-1.9175,1.5416]	-0.3459	0.7523
All-trans-hexaprenyl diphosphate	0.5777[-0.5155,1.6709]	1.4672	0.2162		-0.2252[-0.8579,0.4075]	-0.7757	0.453			.	.			.	.		0.4345[-0.8536,1.7226]	0.9365	0.402		-0.2786[-0.9007,0.3435]	-0.9758	0.3484			.	.			.	.
Arabinosylhypoxanthine	0.2205[-1.2771,1.7181]	0.4087	0.7037		0.2061[-0.2729,0.6899]	0.9533	0.3609			.	.			.	.		-0.2991[-1.8479,1.2496]	-0.5363	0.6202		0.0381[-0.4660,0.5416]	0.1652	0.8718			.	.			.	.
Arachidonic acid-1		.	.		-0.3780[-0.9130,0.1570]	-1.5393	0.1497		-0.0635[-0.6349,0.5079]	-0.3086	0.773		-0.3286[-1.0707,0.4136]	-1.2293	0.2863			.	.		-0.3761[-0.9097,0.1574]	-1.5359	0.1505		-0.1699[-0.7051,0.3654]	-0.8811	0.428		-0.5049[-1.5069,0.4972]	-1.3989	0.2344
Arachidonic acid-2		.	.		-0.5094[-1.0212,0.0024]	-2.1687	0.0509		-0.0637[-0.9109,0.7823]	-0.2417	0.8246		0.3256[-0.5510,1.2023]	1.0314	0.3606			.	.		-0.4205[-0.9612,0.1202]	-1.6943	0.116		-0.2575[-0.9785,0.5039]	-1.0189	0.3833		0.2706[-1.0620,1.6032]	0.5638	0.603
Beta-Citryl-L-glutamic acid-1	0.4919[-0.7946,1.7783]	1.0616	0.3483		0.0021[-0.4904,0.4946]	0.0093	0.9928		0.2360[-0.2129,0.6848]	1.4597	0.2181		-0.2621[-1.3703,0.8461]	-0.6566	0.5473		0.4703[-0.9110,1.8516]	0.9453	0.398		-0.1439[-0.6297,0.3440]	-0.6458	0.5317		0.2165[-0.2585,0.6916]	1.2655	0.2744		-0.4732[-1.9730,1.0265]	-0.8761	0.4304
Beta-Citryl-L-glutamic acid-2	0.3985[-0.9352,1.7322]	0.8296	0.4534		0.1074[-0.4112,0.6261]	0.4513	0.6598		0.2380[-0.1996,0.6756]	1.5098	0.2056		-0.4380[-1.9202,0.9750]	-1.039	0.3752		0.4305[-0.9612,1.8223]	0.8588	0.4388		-0.0286[-0.5497,0.4925]	-0.1196	0.9068		0.2229[-0.2375,0.6833]	1.3442	0.2501		-0.7416[-2.4923,0.8919]	-1.505	0.2294
Butyl octadecanoate	-0.7278[-1.4346,-0.0211]	-2.8592	0.046	*	0.0309[-0.4637,0.5261]	0.1388	0.8921			.	.			.	.		-0.6866[-1.5610,0.1877]	-2.1803	0.0947		-0.2519[-0.7206,0.2203]	-1.1702	0.2667			.	.			.	.
Calcitroic acid	-0.5392[-1.7388,0.6603]	-1.2481	0.2801		-0.3854[-0.9582,0.1873]	-1.4662	0.1683		-0.0673[-0.6365,0.5018]	-0.3285	0.759		-0.3284[-1.0711,0.4142]	-1.2278	0.2868		-0.4035[-1.7770,0.9700]	-0.8157	0.4605		-0.1394[-0.7532,0.4744]	-0.4947	0.6297		-0.1715[-0.7042,0.3613]	-0.8936	0.4221		-0.5044[-1.5074,0.4986]	-1.3964	0.2351
Ceriporic acid A		.	.		-0.3020[-0.8616,0.2576]	-1.1759	0.2624		-0.0514[-0.6235,0.5206]	-0.2497	0.8151		-0.3252[-1.0702,0.4199]	-1.2118	0.2923			.	.		-0.3863[-0.9229,0.1503]	-1.5686	0.1427		-0.1673[-0.7023,0.3676]	-0.8683	0.4342		-0.5036[-1.5069,0.4997]	-1.3936	0.2359
Ceriporic acid C	-0.3592[-1.5854,0.8669]	-0.8135	0.4616		-0.5741[-1.0941,-0.0540]	-2.4052	0.0332	*	-0.1047[-0.6765,0.4672]	-0.5082	0.638		-0.3342[-1.0709,0.4024]	-1.2597	0.2763		-0.5509[-1.7099,0.6080]	-1.3198	0.2574		-0.4833[-1.0364,0.0697]	-1.9041	0.0811		-0.1429[-0.7059,0.4200]	-0.7049	0.5197		-0.5071[-1.5060,0.4918]	-1.4095	0.2315
CL(16:1(9Z)/22:6(4Z,7Z,10Z,13Z,16Z,19Z)/16:1(9Z)/22:6(4Z,7Z,10Z,13Z,16Z,19Z))	0.5818[-0.5046,1.6683]	1.4869	0.2113		-0.1229[-0.7409,0.4952]	-0.4332	0.6726		0.3223[-0.0003,0.6448]	2.7741	0.0501		-0.1281[-1.4605,1.1840]	-0.3327	0.7612		0.4858[-0.7640,1.7356]	1.0792	0.3412		-0.0150[-0.6358,0.6059]	-0.0525	0.959		0.0948[-0.4474,0.6370]	0.4856	0.6527		-0.1317[-1.9109,1.6268]	-0.2556	0.8148
CL(22:6(4Z,7Z,10Z,13Z,16Z,19Z)/16:0/22:6(4Z,7Z,10Z,13Z,16Z,19Z)/22:6(4Z,7Z,10Z,13Z,16Z,19Z))	0.1363[-1.4005,1.6730]	0.2462	0.8176			.	.		0.3665[-0.0004,0.7334]	2.7737	0.0501		0.5762[-0.7078,1.9510]	1.4882	0.2334		-0.3870[-1.9198,1.1459]	-0.7009	0.522			.	.		0.1563[-0.4401,0.7527]	0.7276	0.5072		0.8416[-0.7144,2.5307]	1.7812	0.1729
Clofazimine glucuronide	-0.2225[-1.5338,1.0888]	-0.4711	0.6621			.	.		0.3274[-0.1453,0.8000]	1.9228	0.1269		0.7205[-0.0150,1.5697]	3.1222	0.0524		0.0222[-1.3907,1.4351]	0.0436	0.9673			.	.		0.1465[-0.4849,0.7779]	0.6442	0.5545		0.9592[-0.0077,2.0779]	3.159	0.0509
Collettiside I	-0.5725[-1.7123,0.5673]	-1.3945	0.2356		-0.0362[-0.5826,0.5094]	-0.1476	0.8853		0.0392[-0.6535,0.7319]	0.1571	0.8828		0.3944[-0.3958,1.1846]	1.3859	0.238		-0.5991[-1.7961,0.5979]	-1.3896	0.237		-0.0622[-0.6107,0.4871]	-0.2477	0.8089		-0.2853[-0.8660,0.2954]	-1.364	0.2443		0.3526[-0.9049,1.6102]	0.7785	0.4797
Convalloside	0.6202[-0.4150,1.6554]	1.6634	0.1716		-0.1450[-0.7749,0.4849]	-0.5015	0.6251			.	.			.	.		0.4864[-0.7543,1.7270]	1.0884	0.3376		-0.2179[-0.8374,0.4016]	-0.7663	0.4583			.	.			.	.
Cynaropicrin	0.6675[-0.3919,1.7269]	1.7493	0.1551		-0.2909[-0.8785,0.2967]	-1.0787	0.3019			.	.			.	.		0.4584[-0.8738,1.7907]	0.9554	0.3935		-0.3312[-0.9082,0.2458]	-1.2508	0.2348			.	.			.	.
D8'-Merulinic acid A		.	.			.	.		0.3286[-0.1644,0.8217]	1.8505	0.1379		-0.0311[-1.4332,1.3661]	-0.0763	0.9439			.	.			.	.		-0.2292[-0.8297,0.3713]	-1.0596	0.3491		-0.0774[-1.9377,1.7705]	-0.1434	0.895
DG(16:0/0:0/22:6n3)	-0.8131[-1.5655,-0.0606]	-3.0002	0.0399	*	-0.1637[-0.6845,0.3571]	-0.685	0.5064		0.0362[-0.5309,0.6033]	0.1772	0.868		0.0047[-1.4161,1.4263]	0.0114	0.9916		-0.9589[-1.4618,-0.4560]	-5.2942	0.0061	*	-0.1866[-0.7027,0.3294]	-0.788	0.446		-0.2179[-0.7080,0.2722]	-1.2344	0.2846		0.1120[-1.7534,1.9950]	0.2051	0.8506
DG(18:0/16:0/0:0)	0.1265[-1.1649,1.4180]	0.2721	0.799			.	.		-0.0906[-0.6901,0.5088]	-0.4197	0.6963		-1.1291[-3.4811,1.0446]	-1.7133	0.1852		0.2087[-1.1274,1.5449]	0.4337	0.6868			.	.		0.2538[-0.2559,0.7635]	1.3825	0.239		-1.6852[-4.4070,0.7700]	-2.2358	0.1114
DG(22:6(4Z,7Z,10Z,13Z,16Z,19Z)/18:3(6Z,9Z,12Z)/0:0)	-0.2319[-1.8695,1.4058]	-0.3931	0.7143		0.0050[-0.6156,0.6256]	0.0176	0.9862		0.3515[0.0666,0.6363]	3.426	0.0266	*	0.2915[-1.1995,1.8285]	0.6612	0.5558		-0.8325[-2.1477,0.4827]	-1.7574	0.1537		-0.0489[-0.6668,0.5689]	-0.1726	0.8659		0.0528[-0.5140,0.6196]	0.2587	0.8086		0.4749[-1.4226,2.4475]	0.8428	0.4612
DGDG(14:0/22:4)	0.5839[-0.4861,1.6540]	1.5152	0.2043		-0.1132[-0.7929,0.5665]	-0.3628	0.7231			.	.			.	.		0.5026[-0.7207,1.7258]	1.1407	0.3177		-0.2073[-0.8760,0.4614]	-0.6754	0.5122			.	.			.	.
DGDG(14:0/24:1)		.	.		0.1986[-0.3385,0.7357]	0.8058	0.436		-0.0596[-0.6262,0.5071]	-0.2918	0.7849		-0.3184[-1.0696,0.4329]	-1.1766	0.3046			.	.		0.2132[-0.3199,0.7463]	0.8714	0.4006		-0.1808[-0.7030,0.3414]	-0.9612	0.3909		-0.4977[-1.5074,0.5120]	-1.3685	0.243
DGDG(16:1/22:6)	0.6045[-0.4207,1.6298]	1.6371	0.177		-0.1153[-0.7786,0.5479]	-0.3789	0.7114			.	.			.	.		0.4970[-0.7095,1.7035]	1.1437	0.3165		-0.2338[-0.8825,0.4148]	-0.7855	0.4474			.	.			.	.
DGDG(18:3/17:0)	0.5219[-0.6485,1.6923]	1.2381	0.2834		-0.1480[-0.8008,0.5047]	-0.4941	0.6302			.	.			.	.		0.3423[-1.0212,1.7059]	0.697	0.5242		-0.2770[-0.9108,0.3568]	-0.9523	0.3597			.	.			.	.
DGDG(18:4/22:4)	0.5524[-0.5754,1.6801]	1.3599	0.2455		-0.1903[-0.8802,0.4996]	-0.601	0.559			.	.			.	.		0.4504[-0.8363,1.7371]	0.9719	0.3861		-0.2587[-0.9375,0.4201]	-0.8303	0.4226			.	.			.	.
DGDG(20:1/15:0)	0.5353[-0.6082,1.6787]	1.2997	0.2635		-0.2115[-0.9104,0.4873]	-0.6594	0.5221			.	.			.	.		0.3733[-0.9600,1.7067]	0.7774	0.4804		-0.2849[-0.9711,0.4013]	-0.9047	0.3834			.	.			.	.
DGDG(20:2/13:0)	0.4981[-0.6525,1.6487]	1.2018	0.2957		-0.1384[-0.7764,0.4996]	-0.4727	0.6449			.	.			.	.		0.3599[-0.9567,1.6765]	0.759	0.4901		-0.3150[-0.9256,0.2955]	-1.1242	0.2829			.	.			.	.
DGDG(20:3/20:3)	0.5520[-0.5325,1.6364]	1.4132	0.2305		-0.2934[-1.0199,0.4332]	-0.8798	0.3963		0.0794[-0.5758,0.7345]	0.3363	0.7536		-0.1552[-1.4820,1.1471]	-0.4054	0.7124		0.4242[-0.8381,1.6865]	0.9331	0.4036		-0.2584[-0.9878,0.4709]	-0.772	0.4551		0.1457[-0.4952,0.7867]	0.6313	0.5621		-0.1685[-1.9432,1.5796]	-0.3285	0.7642
DGDG(26:2/22:6)	0.5894[-0.5161,1.6949]	1.4803	0.2129		-0.3935[-1.1091,0.3222]	-1.1979	0.2541		0.0858[-0.5895,0.7610]	0.3526	0.7422		-0.1779[-1.4766,1.0926]	-0.4756	0.6669		0.4516[-0.8479,1.7511]	0.9648	0.3893		-0.3401[-1.0640,0.3838]	-1.0238	0.3261		0.1404[-0.5254,0.8061]	0.5854	0.5897		-0.1997[-1.9396,1.5086]	-0.3979	0.7174
DGDG(9:0/24:0)	0.4867[-0.6789,1.6523]	1.1593	0.3108		-0.1592[-0.8279,0.5094]	-0.5189	0.6132			.	.			.	.		0.3536[-0.9717,1.6789]	0.7408	0.5		-0.2774[-0.9284,0.3736]	-0.9285	0.3715			.	.			.	.
Docosatrienoic acid	-0.5231[-1.5666,0.5205]	-1.3917	0.2364		-0.4316[-0.9426,0.0795]	-1.84	0.0906		-0.1065[-0.6869,0.4739]	-0.5093	0.6373		-0.3637[-1.0734,0.3459]	-1.4231	0.2278		-0.6071[-1.6407,0.4265]	-1.6308	0.1783		-0.3962[-0.9164,0.1240]	-1.6593	0.1229		-0.1554[-0.7216,0.4107]	-0.7623	0.4884		-0.5354[-1.5062,0.4353]	-1.5313	0.2004
dodecyl hydrogen sulfate	0.7883[-0.1725,1.7491]	2.2781	0.085		-0.1379[-0.6545,0.3755]	-0.5962	0.5631			.	.			.	.		0.5526[-0.7686,1.8737]	1.1612	0.3101		-0.1948[-0.7046,0.3177]	-0.8331	0.4225			.	.			.	.
Elaidic carnitine	-0.3915[-1.5715,0.7884]	-0.9213	0.409		-0.1966[-0.9167,0.5235]	-0.5949	0.563		0.3159[-0.1424,0.7742]	1.9136	0.1282		-0.4798[-1.3661,0.3307]	-1.9419	0.1474		-0.7355[-1.6381,0.1672]	-2.2621	0.0865		-0.1333[-0.8568,0.5902]	-0.4015	0.6951		0.2325[-0.3222,0.7872]	1.1638	0.3092		-0.5961[-1.8547,0.5682]	-1.6899	0.1896
Ethyl cellulose	0.5966[-0.4845,1.6777]	1.5321	0.2003		-0.1760[-0.7891,0.4370]	-0.6256	0.5433			.	.			.	.		0.4112[-0.8984,1.7208]	0.8718	0.4325		-0.2147[-0.8209,0.3915]	-0.7718	0.4552			.	.			.	.
Formula C10H20O		.	.			.	.		-0.4646[-1.7668,1.1440]	-0.6809	0.5448		-0.1987[-1.3033,0.9190]	-0.5503	0.6204			.	.			.	.		-0.4890[-1.8273,1.0883]	-0.8067	0.4789		-0.4679[-1.7837,0.9540]	-0.9645	0.4059
Formula C12H11OP	0.4025[-0.7940,1.5990]	0.9341	0.4031		-0.0890[-0.6467,0.4666]	-0.3561	0.7285			.	.			.	.		0.6243[-0.4565,1.7050]	1.6038	0.184		-0.0012[-0.5650,0.5626]	-0.0046	0.9964			.	.			.	.
Formula C12H24O2	0.5175[-0.6548,1.6898]	1.2257	0.2876		-0.2598[-0.7772,0.2517]	-1.1241	0.2849			.	.			.	.		0.3738[-0.9719,1.7195]	0.7712	0.4836		-0.2631[-0.7801,0.2576]	-1.1082	0.2914			.	.			.	.
Formula C13H22O	-0.3984[-1.4826,0.6858]	-1.0202	0.3653		-0.1881[-0.6828,0.3023]	-0.8503	0.4133			.	.			.	.		-0.6330[-1.5593,0.2934]	-1.8971	0.1307		-0.1802[-0.6771,0.3192]	-0.7908	0.4458			.	.			.	.
Formula C13H24O	-0.5301[-1.5068,0.4467]	-1.5067	0.2064		-0.0641[-0.5777,0.4480]	-0.2783	0.7859			.	.			.	.		-0.6436[-1.5642,0.2769]	-1.9413	0.1242		-0.4328[-0.8625,0.0030]	-2.1857	0.0514			.	.			.	.
Formula C18H39NP2	-0.8071[-1.6094,-0.0049]	-2.7934	0.0491	*	0.2424[-0.2213,0.7117]	1.1569	0.2718			.	.			.	.		-0.9704[-1.4948,-0.4461]	-5.1385	0.0068	*	0.1311[-0.3599,0.6202]	0.5846	0.5706			.	.			.	.
Formula C19H37NO2S	-0.8069[-1.5194,-0.0944]	-3.1442	0.0347	*	0.0487[-0.4463,0.5448]	0.2187	0.8309		0.0073[-0.5657,0.5803]	0.0355	0.9734		0.1372[-1.1070,1.3815]	0.3062	0.7747		-0.8747[-1.5564,-0.1930]	-3.5624	0.0235	*	-0.0390[-0.5382,0.4608]	-0.1705	0.8677		-0.2856[-0.7086,0.1374]	-1.8748	0.1341		0.3476[-1.3522,2.0474]	0.5678	0.6005
Formula C19H40O3P2	0.7739[-0.5621,2.1100]	1.6083	0.183		0.2587[-0.2392,0.7626]	1.1499	0.2746			.	.			.	.		0.2225[-1.5493,1.9943]	0.3487	0.7449		-0.1644[-0.6861,0.3596]	-0.6873	0.5061			.	.			.	.
Formula C21H22N2S2	0.4037[-0.8424,1.6498]	0.8995	0.4192		-0.0753[-0.6624,0.5101]	-0.2859	0.7803			.	.			.	.		0.7061[-0.3396,1.7518]	1.8749	0.1341		0.0311[-0.5614,0.6231]	0.1146	0.9108			.	.			.	.
Formula C24H40O2	-0.4365[-1.4901,0.6171]	-1.1502	0.3141		-0.1798[-0.6731,0.3094]	-0.8146	0.4326			.	.			.	.		-0.6058[-1.5641,0.3524]	-1.7553	0.1541		-0.2665[-0.7429,0.2136]	-1.2177	0.2488			.	.			.	.
Formula C25H52NO9P	-0.3794[-1.4572,0.6984]	-0.9774	0.3837			.	.		0.1278[-0.3998,0.6554]	0.6726	0.5381		-0.4007[-1.0749,0.2735]	-1.6501	0.1743		-0.3654[-1.5171,0.7863]	-0.8809	0.4281			.	.		0.3393[0.0308,0.6479]	3.0535	0.0379	*	-0.4798[-1.5102,0.5506]	-1.2928	0.2657
Formula C40H64O4	-0.0969[-1.5441,1.3502]	-0.1859	0.8615		-0.5156[-1.1187,0.0876]	-1.8624	0.0872		-0.0600[-0.6278,0.5078]	-0.2936	0.7837		-0.3201[-1.0701,0.4298]	-1.1851	0.3016		-0.3241[-1.7808,1.1326]	-0.6178	0.5701		-0.3907[-1.0276,0.2461]	-1.3368	0.2061		-0.1776[-0.7033,0.3480]	-0.9383	0.4012		-0.4986[-1.5077,0.5104]	-1.372	0.242
Formula C40H68O4		.	.		-0.3484[-0.8797,0.1829]	-1.4286	0.1786		-0.0625[-0.6292,0.5042]	-0.3062	0.7747		-0.3187[-1.0697,0.4322]	-1.1784	0.3039			.	.		-0.3200[-0.8564,0.2164]	-1.2998	0.2181		-0.1790[-0.7031,0.3451]	-0.9482	0.3967		-0.4975[-1.5075,0.5124]	-1.3678	0.2432
Formula C55H105O18P	-0.1935[-1.3753,0.9883]	-0.4546	0.673		-0.1569[-0.6529,0.3354]	-0.7071	0.4942		-0.1827[-0.6698,0.3044]	-1.0412	0.3566		-0.2431[-1.0625,0.5764]	-0.8235	0.4565		-0.3326[-1.5172,0.8520]	-0.7795	0.4792		-0.2716[-0.7461,0.2066]	-1.2463	0.2385		0.2854[-0.1041,0.6749]	2.0347	0.1116		-0.3954[-1.5118,0.7210]	-0.9834	0.3811
fruticoside E		.	.		-0.4751[-1.0828,0.1325]	-1.7036	0.1142		-0.0580[-0.6277,0.5116]	-0.2829	0.7913		-0.3228[-1.0715,0.4259]	-1.197	0.2974			.	.		-0.3845[-1.0147,0.2458]	-1.3291	0.2085		-0.1771[-0.7047,0.3504]	-0.9322	0.404		-0.4990[-1.5091,0.5110]	-1.3717	0.2421
Ganglioside GA1 (d18:1/16:0)	0.5663[-0.4871,1.6197]	1.4926	0.2098		-0.3055[-1.0036,0.3925]	-0.9537	0.3591		0.1184[-0.5535,0.7903]	0.4893	0.6502		-0.1554[-1.4520,1.1167]	-0.4154	0.7058		0.4461[-0.7859,1.6781]	1.0053	0.3716		-0.2366[-0.9429,0.4696]	-0.73	0.4794		0.1010[-0.5846,0.7866]	0.409	0.7035		-0.1695[-1.9043,1.5386]	-0.3381	0.7576
Ganglioside GA1 (d18:1/18:0)	0.0808[-1.5254,1.6870]	0.1396	0.8957			.	.		0.3371[0.0662,0.6080]	3.4549	0.0259	*	-0.0010[-1.7157,1.7135]	-0.0021	0.9985		-0.4553[-2.0216,1.1110]	-0.8071	0.4649			.	.		0.0850[-0.4492,0.6192]	0.4417	0.6815		0.0781[-2.1874,2.3559]	0.118	0.9135
Ganglioside GA1 (d18:1/9Z-18:1)	0.3576[-0.8236,1.5388]	0.8406	0.4479		-0.3580[-1.0830,0.3670]	-1.0759	0.3031		0.0462[-0.6635,0.7559]	0.1807	0.8654		-0.1962[-1.4623,1.0390]	-0.5386	0.6276		0.5334[-0.5884,1.6551]	1.3202	0.2573		-0.2762[-1.0128,0.4604]	-0.817	0.4298		0.0441[-0.6742,0.7624]	0.1706	0.8728		-0.2265[-1.9247,1.4358]	-0.463	0.6749
Ganglioside GM2 (d18:1/14:0)	0.4648[-0.8724,1.8020]	0.965	0.3892		-0.5776[-1.3101,0.1549]	-1.7182	0.1114			.	.			.	.		0.3766[-1.0905,1.8437]	0.7127	0.5154		-0.4468[-1.2119,0.3183]	-1.2724	0.2273			.	.			.	.
Ganglioside GM3 (d18:0/14:0)	0.5361[-0.6073,1.6795]	1.3019	0.2629		-0.3563[-1.0465,0.3339]	-1.1247	0.2827		0.1009[-0.5735,0.7753]	0.4153	0.6993		-0.1289[-1.4386,1.1605]	-0.3406	0.7559		0.3938[-0.9288,1.7165]	0.8267	0.4548		-0.3322[-1.0248,0.3604]	-1.0452	0.3165		0.1703[-0.4852,0.8258]	0.7212	0.5107		-0.1318[-1.8814,1.5970]	-0.2602	0.8115
Ganglioside GM3 (d18:1/9Z-18:1)	0.6146[-0.4122,1.6413]	1.6617	0.1719		-0.3367[-1.0519,0.3784]	-1.0258	0.3252		0.1205[-0.5401,0.7812]	0.5064	0.6392		-0.1311[-1.4454,1.1625]	-0.3452	0.7527		0.5529[-0.6184,1.7242]	1.3106	0.2602		-0.2661[-0.9905,0.4583]	-0.8003	0.4391		0.1467[-0.5120,0.8054]	0.6185	0.5697		-0.1355[-1.8912,1.5989]	-0.2666	0.8071
Glutathione	0.0582[-1.1453,1.2616]	0.1342	0.8997		-0.0006[-0.5309,0.5296]	-0.0026	0.9979			.	.			.	.		-0.1181[-1.3727,1.1364]	-0.2615	0.8067		-0.2372[-0.7443,0.2699]	-1.019	0.3283			.	.			.	.
Hexyl decanoate		.	.		-0.3413[-0.8585,0.1759]	-1.438	0.176		-0.0595[-0.6334,0.5143]	-0.2881	0.7876		-0.3329[-1.0707,0.4049]	-1.2527	0.2785			.	.		-0.4789[-0.9489,-0.0090]	-2.2204	0.0464	*	-0.1677[-0.7061,0.3706]	-0.865	0.4358		-0.5113[-1.5062,0.4836]	-1.4269	0.2268
Kiwiionoside	-0.4543[-1.7526,0.8439]	-0.9717	0.3862		0.1142[-0.4178,0.6463]	0.4678	0.6483			.	.			.	.		0.0946[-1.4138,1.6029]	0.1741	0.8703		0.3067[-0.1926,0.8059]	1.3383	0.2056			.	.			.	.
L-Acetylcarnitine	0.0616[-1.4106,1.5338]	0.1162	0.9131			.	.		0.2639[-0.1625,0.6904]	1.7182	0.1609		-0.5096[-1.8767,0.7769]	-1.3189	0.2788		-0.0724[-1.6160,1.4712]	-0.1302	0.9027			.	.		0.1635[-0.3581,0.6850]	0.8701	0.4333		-0.7362[-2.4598,0.8709]	-1.5182	0.2263
Latanoprost	-0.2703[-1.5344,0.9937]	-0.5938	0.5846		-0.0809[-0.6264,0.4645]	-0.3232	0.7521			.	.			.	.		-0.0542[-1.4354,1.3269]	-0.109	0.9184		-0.3646[-0.8602,0.1309]	-1.6031	0.1349			.	.			.	.
LBPA(16:0/18:1(9Z))	-0.6709[-1.4304,0.0887]	-2.4522	0.0703		-0.2589[-0.7349,0.2112]	-1.2182	0.2486			.	.			.	.		-0.6673[-1.5224,0.1878]	-2.1667	0.0962		-0.3641[-0.8088,0.0857]	-1.7793	0.1028			.	.			.	.
LMFA07010548	-0.5448[-1.5353,0.4457]	-1.5271	0.2014		-0.0929[-0.5866,0.3986]	-0.4198	0.6827			.	.			.	.		-0.6837[-1.5827,0.2152]	-2.1118	0.1023		-0.2843[-0.7459,0.1814]	-1.3399	0.2073			.	.			.	.
L-Palmitoylcarnitine	0.0061[-1.2211,1.2332]	0.0137	0.9897			.	.		0.3390[-0.0751,0.7530]	2.273	0.0854		-0.5728[-1.1943,-0.0417]	-3.4129	0.0421	*	-0.4197[-1.5677,0.7282]	-1.0152	0.3674			.	.		0.1985[-0.3727,0.7696]	0.9648	0.3893		-0.7050[-1.7124,0.1908]	-2.5442	0.0844
L-Phenylalanine	0.5212[-1.9116,2.9540]	0.5949	0.584			.	.		0.1724[-0.3165,0.6614]	0.9791	0.383		-0.5704[-1.3166,0.0857]	-2.7935	0.0682		0.4779[-2.1007,3.0564]	0.5146	0.634			.	.		0.2400[-0.1985,0.6785]	1.5196	0.2032		-0.7636[-1.7351,0.0872]	-2.8779	0.0636
L-Threo-3-Phenylserine	0.9242[-0.9369,2.7852]	1.3787	0.2401		0.0729[-0.4476,0.5933]	0.3051	0.7655		0.1686[-0.3542,0.6915]	0.8955	0.4211		-0.5591[-1.2791,0.0727]	-2.84	0.0656		0.6413[-1.5565,2.8391]	0.8102	0.4633		-0.1307[-0.6450,0.3837]	-0.5535	0.5901		0.2824[-0.1444,0.7093]	1.8371	0.1401		-0.7482[-1.6854,0.0706]	-2.9265	0.0612
LysoPC(15:0)	-0.4051[-1.4548,0.6446]	-1.0715	0.3443			.	.		0.1897[-0.3048,0.6842]	1.065	0.3469		-0.4006[-1.0805,0.2793]	-1.6359	0.1772		-0.3417[-1.4974,0.8140]	-0.8209	0.4578			.	.		0.3073[-0.0660,0.6805]	2.2858	0.0842		-0.4556[-1.5140,0.6027]	-1.1953	0.298
Methyltestosterone		.	.		-0.3949[-1.0820,0.2922]	-1.2522	0.2343		-0.0843[-0.6609,0.4922]	-0.406	0.7055		-0.3445[-1.0772,0.3882]	-1.3054	0.2618			.	.		-0.5024[-1.1586,0.1538]	-1.6683	0.1211		-0.1567[-0.7107,0.3972]	-0.7856	0.4761		-0.5088[-1.5136,0.4960]	-1.4058	0.2325
MG(14:1(9Z)/0:0/0:0)	-0.2926[-1.8474,1.2622]	-0.5225	0.6289			.	.		0.3505[0.0653,0.6357]	3.4117	0.027	*	0.5427[-1.0339,2.2049]	1.1506	0.3333		-0.8693[-2.0463,0.3076]	-2.0507	0.1096			.	.		0.0664[-0.4966,0.6294]	0.3274	0.7598		0.8343[-1.0820,2.8825]	1.4454	0.2441
MGDG(11:0/18:3)	0.7307[-0.1739,1.6353]	2.2426	0.0884		-0.1649[-0.8046,0.4749]	-0.5615	0.5848		0.1912[-0.3768,0.7593]	0.9347	0.4028		-0.0986[-1.4670,1.2541]	-0.2489	0.8195		0.5819[-0.5928,1.7567]	1.3753	0.241		-0.2361[-0.8648,0.3927]	-0.818	0.4293		0.0045[-0.6299,0.6388]	0.0195	0.9854		-0.0883[-1.9122,1.7216]	-0.1669	0.8781
MGDG(15:1/16:1)	-0.6524[-1.5705,0.2657]	-1.9729	0.1198		-0.1897[-0.7446,0.3652]	-0.7448	0.4707			.	.			.	.		-0.6665[-1.6534,0.3204]	-1.8751	0.134		-0.4954[-0.9677,-0.0230]	-2.2851	0.0413	*		.	.			.	.
MGDG(22:2/20:5)	-0.0621[-1.7836,1.6594]	-0.1002	0.925		0.2461[-0.2973,0.7895]	0.9867	0.3433		0.3618[0.1206,0.6029]	4.1646	0.0141	*	0.3697[-1.0310,1.8287]	0.8877	0.4401		-0.6912[-2.2238,0.8414]	-1.2522	0.2787		0.1792[-0.3727,0.7311]	0.7074	0.4928		0.0613[-0.4959,0.6185]	0.3054	0.7753		0.6103[-1.0986,2.4158]	1.1928	0.3187
MGDG(22:5/24:4)	0.0868[-1.5866,1.7601]	0.144	0.8925		0.1268[-0.4327,0.6863]	0.4938	0.6303		0.3472[0.0800,0.6143]	3.608	0.0226	*	0.5428[-0.9695,2.1409]	1.1985	0.3168		-0.5100[-2.1212,1.1011]	-0.8789	0.4291		0.0735[-0.4880,0.6350]	0.2852	0.7804		0.0679[-0.4815,0.6173]	0.3433	0.7487		0.8383[-0.9781,2.7873]	1.5291	0.2237
MGDG(24:4/20:5)	0.4795[-0.6661,1.6251]	1.1621	0.3098		-0.0940[-0.7237,0.5356]	-0.3254	0.7505		0.1556[-0.4080,0.7192]	0.7666	0.486		-0.2208[-1.4926,1.0161]	-0.6044	0.5882		0.3558[-0.9434,1.6550]	0.7604	0.4894		-0.2815[-0.8866,0.3236]	-1.0137	0.3307		0.1596[-0.4095,0.7286]	0.7785	0.4798		-0.2589[-1.9672,1.4085]	-0.5268	0.6348
MGDG(5:0/24:0)	-0.1325[-1.8326,1.5675]	-0.2165	0.8392		0.0149[-0.5624,0.5922]	0.0563	0.9561		0.3460[0.0487,0.6434]	3.2312	0.0319	*	0.3992[-1.1988,2.0602]	0.8411	0.462		-0.7659[-2.2107,0.6789]	-1.4719	0.215		-0.0113[-0.5868,0.5642]	-0.0428	0.9666		0.0456[-0.5224,0.6136]	0.223	0.8344		0.6618[-1.3022,2.7304]	1.1271	0.3417
Misoprostol	0.5587[-0.5340,1.6514]	1.4195	0.2288			.	.		0.3457[0.0632,0.6282]	3.3981	0.0273	*	-0.2843[-1.6189,1.0054]	-0.744	0.5109		0.4426[-0.8215,1.7068]	0.9721	0.386			.	.		0.1144[-0.4261,0.6549]	0.5876	0.5883		-0.2643[-2.1078,1.5374]	-0.498	0.6527
Monoethylhexyl phthalic acid	-0.3563[-1.6664,0.9538]	-0.755	0.4923		0.1886[-0.4329,0.8101]	0.6613	0.5209			.	.			.	.		-0.1748[-1.6236,1.2739]	-0.3351	0.7544		0.0280[-0.6025,0.6585]	0.0968	0.9245			.	.			.	.
m-Tyramine	0.8771[-1.1355,2.8896]	1.21	0.2929			.	.		0.1635[-0.3345,0.6614]	0.9115	0.4136		-0.5663[-1.3126,0.0906]	-2.7715	0.0695		0.7031[-1.5632,2.9693]	0.8613	0.4376			.	.		0.2438[-0.1944,0.6819]	1.5446	0.1973		-0.7571[-1.7318,0.0978]	-2.8423	0.0655
N-acetyl-alpha-muramate	0.3910[-0.8599,1.6418]	0.8678	0.4345		0.1078[-0.4627,0.6808]	0.4198	0.6827		-0.1161[-0.6691,0.4369]	-0.5828	0.5913		0.4574[-0.1631,1.0780]	2.0467	0.1101		0.7955[-0.1134,1.7045]	2.4301	0.072		0.2082[-0.3573,0.7707]	0.8067	0.4369		0.2655[-0.1859,0.7169]	1.6328	0.1778		0.8268[0.3409,1.3126]	4.7243	0.0091	*
Notoginsenoside J	0.3378[-1.0528,1.7283]	0.6744	0.537		-0.4404[-1.1233,0.2426]	-1.4049	0.1854			.	.			.	.		0.3964[-1.0413,1.8341]	0.7655	0.4867		-0.3629[-1.0612,0.3354]	-1.1323	0.2796			.	.			.	.
N-Palmitoylsphingosine		.	.		-0.3809[-0.9418,0.1800]	-1.4795	0.1648		-0.0935[-0.9228,0.7342]	-0.3624	0.7411		-0.0611[-1.3598,1.2376]	-0.1306	0.9024			.	.		-0.4037[-0.9561,0.1488]	-1.5919	0.1374		-0.1842[-0.9621,0.6226]	-0.6818	0.5443		-0.1045[-1.9257,1.7166]	-0.1594	0.8811
octadeca-10,12-dienoic acid		.	.		-0.2436[-0.7861,0.2989]	-0.9783	0.3472		-0.0545[-0.6243,0.5153]	-0.2656	0.8037		-0.3254[-1.0702,0.4194]	-1.2129	0.2919			.	.		-0.3633[-0.8767,0.1500]	-1.542	0.149		-0.1732[-0.7027,0.3562]	-0.9085	0.415		-0.5032[-1.5068,0.5004]	-1.3921	0.2363
Ophiopogonin C'		.	.		-0.5447[-1.1079,0.0185]	-2.1074	0.0568		-0.0507[-0.9091,0.8067]	-0.1898	0.8616		0.3255[-0.5604,1.2114]	1.0201	0.3654			.	.		-0.2418[-0.8811,0.3975]	-0.8241	0.426		-0.2814[-0.9851,0.4665]	-1.1371	0.3381		0.2677[-1.0779,1.6133]	0.5524	0.6101
PA(19:0/18:4(6Z,9Z,12Z,15Z))	-0.5475[-1.4655,0.3704]	-1.6561	0.173		-0.0243[-0.5169,0.4679]	-0.1097	0.9147		-0.7691[-1.8947,0.3565]	-1.897	0.1307		-0.0861[-1.1268,0.9547]	-0.2296	0.8297		-0.4762[-1.5373,0.5850]	-1.2458	0.2808		0.1135[-0.3778,0.6032]	0.5058	0.623		-0.8372[-1.8920,0.2177]	-2.2034	0.0923		0.0129[-1.4575,1.4832]	0.0243	0.9818
PA(P-16:0e/18:2(9Z,12Z))		.	.		-0.7195[-1.2641,-0.1749]	-2.8785	0.0139	*	-0.0388[-0.9053,0.8269]	-0.144	0.8947		0.3147[-0.5907,1.2201]	0.9651	0.3891			.	.		-0.5577[-1.1703,0.0549]	-1.9836	0.0707		-0.2749[-0.9934,0.4867]	-1.0895	0.3556		0.2509[-1.1167,1.6184]	0.5093	0.6373
PE(20:4(5Z,8Z,11Z,14Z)/18:1(11Z))	0.2092[-1.0419,1.4604]	0.4643	0.6666		0.2857[-0.1804,0.7584]	1.3549	0.2026		-0.0630[-0.6266,0.5005]	-0.3105	0.7717		0.3538[-0.9404,1.6479]	0.7589	0.4902		0.5880[-0.4839,1.6600]	1.5231	0.2024		0.1110[-0.3952,0.6156]	0.48	0.6406		0.1966[-0.3117,0.7049]	1.0739	0.3433		0.2765[-1.6283,2.1813]	0.403	0.7075
Perindopril		.	.		-0.6155[-1.1165,-0.1144]	-2.6762	0.0202	*	-0.0115[-0.8779,0.8548]	-0.0426	0.9687		0.3147[-0.6107,1.2402]	0.9443	0.3985			.	.		-0.4990[-1.0466,0.0486]	-1.9854	0.0704		-0.2709[-0.9910,0.4917]	-1.0717	0.3624		0.2309[-1.1695,1.6312]	0.4578	0.6709
PG(P-16:0/14:1(9Z))		.	.		-0.4289[-1.0007,0.1429]	-1.6341	0.1282		-0.0550[-0.6241,0.5142]	-0.2681	0.8019		-0.3224[-1.0705,0.4257]	-1.1965	0.2976			.	.		-0.4168[-0.9899,0.1564]	-1.5844	0.1391		-0.1780[-0.7038,0.3478]	-0.9398	0.4005		-0.4995[-1.5077,0.5086]	-1.3757	0.2409
PGP(16:1(9Z)/22:6(4Z,7Z,10Z,13Z,16Z,19Z))	0.6021[-0.4565,1.6608]	1.5791	0.1895		-0.1391[-0.7644,0.4862]	-0.4847	0.6366			.	.			.	.		0.4472[-0.8244,1.7187]	0.9764	0.3842		-0.2283[-0.8411,0.3845]	-0.8117	0.4328			.	.			.	.
Phaseoluside A	0.5980[-0.4739,1.6698]	1.5489	0.1963		-0.3686[-1.0469,0.3097]	-1.184	0.2594		0.0887[-0.6966,0.8740]	0.3136	0.7695		-0.2505[-1.4578,0.9174]	-0.7241	0.5214		0.4970[-0.7466,1.7406]	1.1096	0.3294		-0.3039[-0.9925,0.3847]	-0.9615	0.3553		0.1167[-0.6710,0.9044]	0.4114	0.7019		-0.3027[-1.9272,1.2739]	-0.6495	0.5623
Progesterone	0.3318[-2.7004,3.3640]	0.3038	0.7764			.	.		0.2085[-0.2738,0.6909]	1.2003	0.2963		-0.3040[-1.6340,0.9779]	-0.7994	0.4825		0.5459[-2.5808,3.6726]	0.4847	0.6532			.	.		0.2443[-0.2128,0.7014]	1.4838	0.212		-0.4907[-2.1731,1.1141]	-1.0253	0.3807
Propyl 1-(propylsulfinyl)propyl disulfide	0.3956[-0.8077,1.5989]	0.9127	0.413			.	.		-0.0524[-0.6498,0.5451]	-0.2433	0.8198		0.3451[-0.7466,1.4368]	0.8776	0.4297		0.6392[-0.4276,1.7059]	1.6636	0.1715			.	.		0.2708[-0.2082,0.7498]	1.5697	0.1916		0.8375[-0.3661,2.0411]	1.932	0.1255
Pseudoginsenoside Rc1	0.6226[-0.4114,1.6567]	1.6717	0.1699		-0.3706[-1.0519,0.3107]	-1.1852	0.2589		0.1603[-0.6118,0.9324]	0.5764	0.5952		-0.2378[-1.4573,0.9442]	-0.6799	0.5453		0.4798[-0.7672,1.7269]	1.0683	0.3456		-0.3059[-0.9974,0.3857]	-0.9637	0.3542		0.1249[-0.6693,0.9191]	0.4366	0.6849		-0.2846[-1.9245,1.3102]	-0.6043	0.5883
Ptilosteroid B	0.4577[-0.7686,1.6841]	1.0363	0.3586		0.2828[-0.2518,0.8238]	1.1705	0.2665			.	.			.	.		0.2277[-1.1864,1.6417]	0.447	0.678		-0.1482[-0.7131,0.4189]	-0.5721	0.5788			.	.			.	.
Remikiren	0.5886[-0.4981,1.6753]	1.5039	0.207		-0.2108[-0.8412,0.4197]	-0.7283	0.4804			.	.			.	.		0.4480[-0.8356,1.7315]	0.969	0.3874		-0.2644[-0.8847,0.3560]	-0.9285	0.3715			.	.			.	.
Retinol acetate		.	.		-0.6281[-1.1203,-0.1360]	-2.7808	0.0166	*	-0.0529[-0.8994,0.7927]	-0.2008	0.8537		0.3225[-0.5584,1.2033]	1.0165	0.3669			.	.		-0.3354[-0.9281,0.2572]	-1.2331	0.2411		-0.2692[-0.9736,0.4773]	-1.0885	0.356		0.2628[-1.0753,1.6009]	0.5453	0.6145
Sagittariol		.	.		-0.6980[-1.1812,-0.2148]	-3.1475	0.0084	*	-0.0370[-0.9000,0.8253]	-0.1378	0.8991		0.3202[-0.5782,1.2185]	0.9895	0.3784			.	.		-0.5473[-1.0996,0.0050]	-2.159	0.0518		-0.2655[-0.9901,0.5007]	-1.0449	0.3729		0.2515[-1.1115,1.6144]	0.5123	0.6355
Sciadonic acid		.	.		-0.4960[-1.0336,0.0415]	-2.0105	0.0674		-0.0861[-0.6568,0.4846]	-0.4188	0.6969		-0.3317[-1.0707,0.4072]	-1.2464	0.2806			.	.		-0.4345[-0.9906,0.1215]	-1.7026	0.1144		-0.1599[-0.7064,0.3866]	-0.8125	0.4621		-0.5044[-1.5061,0.4973]	-1.3981	0.2346
Sclareol		.	.		-0.4389[-0.9495,0.0717]	-1.8728	0.0857		-0.0566[-0.6327,0.5195]	-0.2727	0.7986		-0.3352[-1.0698,0.3995]	-1.2666	0.274			.	.		-0.5185[-0.9965,-0.0405]	-2.3634	0.0358	*	-0.1742[-0.7104,0.3620]	-0.902	0.418		-0.5136[-1.5044,0.4771]	-1.4394	0.2234
S-Furanopetasitin	0.6216[-0.4341,1.6774]	1.6348	0.1774		-0.1994[-0.8295,0.4308]	-0.6894	0.5037			.	.			.	.		0.4880[-0.7718,1.7478]	1.0754	0.3427		-0.2378[-0.8606,0.3850]	-0.832	0.4216			.	.			.	.
Simonin IV	0.2614[-1.2851,1.8080]	0.4693	0.6633		-0.2566[-0.9021,0.3889]	-0.8662	0.4034			.	.			.	.		-0.2108[-1.8513,1.4298]	-0.3567	0.7393		-0.1679[-0.8227,0.4869]	-0.5588	0.5866			.	.			.	.
S-Propyl 1-propanesulfinothioate	0.3821[-0.8589,1.6230]	0.8548	0.4409		-0.0894[-0.6723,0.4914]	-0.3422	0.7387		0.0320[-0.5602,0.6242]	0.15	0.888		0.3552[-0.6587,1.3691]	0.9727	0.3858		0.6951[-0.3409,1.7310]	1.8628	0.136		0.0201[-0.5690,0.6089]	0.0747	0.9418		0.1993[-0.3340,0.7326]	1.0377	0.358		0.8190[-0.2818,1.9199]	2.0656	0.1078
Stearoylcarnitine	-0.3989[-1.5157,0.7179]	-0.9917	0.3775		-0.8101[-1.3388,-0.2815]	-3.339	0.0059	*	0.2991[-0.1638,0.7620]	1.7942	0.1472		-0.6131[-1.0419,-0.2812]	-5.5354	0.0116	*	-0.7438[-1.5462,0.0586]	-2.5738	0.0617		-0.6370[-1.2495,-0.0244]	-2.2658	0.0428	*	0.0502[-0.5751,0.6754]	0.2227	0.8347		-0.7937[-1.4763,-0.2366]	-4.3971	0.0218	*
Sulfatide(d14:1/18:1)		.	.		0.0336[-0.5749,0.6421]	0.1203	0.9062		-0.0136[-0.6597,0.6324]	-0.0586	0.9561		-0.1382[-1.0855,0.8091]	-0.4052	0.7061			.	.		0.0521[-0.5540,0.6581]	0.1872	0.8546		-0.2942[-0.8048,0.2164]	-1.5998	0.1849		-0.2555[-1.5651,1.0541]	-0.5417	0.6168
Tetradecanoylcarnitine	-0.0206[-1.2950,1.2537]	-0.0449	0.9663		-0.2836[-0.8611,0.2938]	-1.0703	0.3056		0.2537[-0.2231,0.7305]	1.4773	0.2137		-0.5766[-1.2684,0.0241]	-3.0638	0.0548		-0.4013[-1.6169,0.8142]	-0.9167	0.4112		-0.2061[-0.7944,0.3823]	-0.7631	0.4601		0.2932[-0.1473,0.7336]	1.848	0.1383		-0.7124[-1.7913,0.2539]	-2.3924	0.0965
trans-2-Tetradecenoylcarnitine	-0.3647[-2.2492,1.5199]	-0.5372	0.6196			.	.		0.2380[-0.2415,0.7176]	1.3782	0.2402		-0.5360[-1.3579,0.2013]	-2.3607	0.0993		-1.0163[-2.4994,0.4668]	-1.9026	0.1298			.	.		0.2671[-0.1908,0.7250]	1.6196	0.1806		-0.6525[-1.8828,0.4747]	-1.9008	0.1535
trans-Hexadec-2-enoyl carnitine	-0.3275[-1.6544,0.9994]	-0.6852	0.5308			.	.		0.2666[-0.2013,0.7346]	1.582	0.1888		-0.4770[-1.3652,0.3359]	-1.9258	0.1498		-0.6421[-1.8127,0.5285]	-1.5229	0.2025			.	.		0.2585[-0.2269,0.7439]	1.4786	0.2133		-0.5932[-1.8523,0.5720]	-1.6806	0.1914
Tridecyl phloretate	-0.6999[-1.6939,0.2940]	-1.9553	0.1222		-0.4175[-0.9709,0.1360]	-1.6436	0.1262		-0.0911[-0.6633,0.4812]	-0.4419	0.6814		-0.3333[-1.0704,0.4039]	-1.2554	0.2777		-0.7124[-1.7838,0.3590]	-1.8462	0.1386		-0.2300[-0.8233,0.3632]	-0.8448	0.4147		-0.1562[-0.7080,0.3956]	-0.786	0.4758		-0.5089[-1.5056,0.4879]	-1.4175	0.2293
Triethanolamine		.	.		-0.0309[-0.5527,0.4909]	-0.1289	0.8996		0.2471[-0.4090,0.9077]	1.2055	0.3144		0.0477[-0.8770,0.9724]	0.1432	0.8931			.	.		-0.1886[-0.6954,0.3183]	-0.8106	0.4334		0.2798[-0.3954,0.9111]	1.2562	0.298		-0.1459[-1.4314,1.1396]	-0.3152	0.7684
Trimethyltridecanoic acid		.	.		-0.2226[-0.7674,0.3221]	-0.8905	0.3907		-0.0556[-0.8843,0.7720]	-0.2158	0.843		0.3026[-0.5728,1.1779]	0.9596	0.3916			.	.		-0.3191[-0.8426,0.2044]	-1.3281	0.2088		-0.2729[-0.9525,0.4495]	-1.1417	0.3365		0.2221[-1.1054,1.5497]	0.4645	0.6664
Undecaprenyl diphosphate	0.5428[-0.5517,1.6372]	1.3769	0.2406		-0.1852[-0.8790,0.5086]	-0.5815	0.5716		0.0853[-0.5468,0.7174]	0.3746	0.7269		-0.1776[-1.4910,1.1078]	-0.4693	0.6709		0.4392[-0.8143,1.6926]	0.9727	0.3858		-0.2555[-0.9382,0.4271]	-0.8156	0.4306		0.1508[-0.4652,0.7668]	0.6795	0.5341		-0.1991[-1.9584,1.5288]	-0.3921	0.7212
Vinblastine	0.5753[-0.5296,1.6802]	1.4456	0.2218		-0.1706[-0.7834,0.4422]	-0.6065	0.5555			.	.			.	.		0.3933[-0.9284,1.7151]	0.8263	0.4551		-0.2466[-0.8471,0.3539]	-0.8947	0.3885			.	.			.	.

## Sheet: Cord Plasma
Supplementary Table 2B. Correlation between fetal growth and metabolites in cord plasma.
	Neonatal Birthweight (g)																Neonatal Birth Length (cm)
	Uncomplicated Singleton Pregnancy (n=8)				Uncomplicated MCDA Twin Pregnancy (n=16)				RFA sIUFD (n=8)				Spontaneous sIUFD (n=8)				Uncomplicated Singleton Pregnancy (n=8)				Uncomplicated MCDA Twin Pregnancy (n=16)				RFA sIUFD (n=8)				Spontaneous sIUFD (n=8)
metabolites	Standardization β	t Value	P value	Sig.	Standardization β	t Value	P value	Sig.	Standardization β	t Value	P value	Sig.	Standardization β	t Value	P value	Sig.	Standardization β	t Value	P value	Sig.	Standardization β	t Value	P value	Sig.	Standardization β	t Value	P value	Sig.	Standardization β	t Value	P value	Sig.
(+)-Dysideapalaunic acid		.	.			.	.		0.2495[-0.1647,0.6637]	1.6726	0.1697		-0.0676[-1.1583,1.0276]	-0.1903	0.8612			.	.			.	.		0.1606[-0.3381,0.6593]	0.8939	0.4219		-0.1932[-1.6150,1.2724]	-0.3776	0.7308
(3R,16R)-3,16-dihydroxymargaric acid		.	.			.	.		0.3253[-0.0052,0.6559]	2.7328	0.0523		-0.1332[-1.4470,1.1894]	-0.3109	0.7762			.	.			.	.		0.0973[-0.4525,0.6472]	0.4914	0.6489		-0.5077[-2.0487,1.1485]	-0.8961	0.4362
(3R,18R)-3,18-dihydroxynonadecanoic acid		.	.			.	.		0.2853[-0.0846,0.6553]	2.1412	0.099		-0.1087[-1.2625,1.0522]	-0.2891	0.7913			.	.			.	.		0.1001[-0.4303,0.6305]	0.5242	0.6278		-0.3372[-1.7770,1.1790]	-0.6438	0.5656
(6b,7b,13R)-6,7-Diacetoxy-8,14-labdadiene-13-ol	0.4503[-0.7997,1.7004]	1.0002	0.3738		-0.3100[-0.8056,0.1855]	-1.363	0.1979			.	.			.	.		0.6284[-0.5500,1.8068]	1.4806	0.2128		-0.0275[-0.5580,0.5031]	-0.1128	0.9121			.	.			.	.
(R)-3,4-Dihydro-8-hydroxy-3-tridecyl-1H-2-benzopyran-1-one		.	.			.	.		0.3748[0.0832,0.6663]	3.5691	0.0234	*	-0.4703[-1.4865,0.5771]	-1.4024	0.2554			.	.			.	.		0.0480[-0.5517,0.6477]	0.2222	0.835		-0.7078[-1.9890,0.7339]	-1.4669	0.2387
1-(10Z-heptadecenoyl)-sn-glycero-3-phosphocholine		.	.			.	.		0.3766[0.1620,0.5913]	4.872	0.0082	*	-0.1243[-1.4125,1.1721]	-0.296	0.7865			.	.			.	.		0.0769[-0.4848,0.6386]	0.3801	0.7232		-0.2595[-1.9405,1.4804]	-0.428	0.6975
1,1'-[1,11-Undecanediylbis(oxy)]bisbenzene	-0.3765[-1.6036,0.8505]	-0.852	0.4422			.	.		0.1737[-0.3742,0.7216]	0.8802	0.4284		-0.3537[-1.2384,0.5311]	-1.1099	0.3293		-0.1694[-1.5486,1.2098]	-0.3409	0.7503			.	.		0.0454[-0.5569,0.6478]	0.2095	0.8443		-0.3299[-1.6744,1.0147]	-0.6812	0.5332
1-[(8Z,11Z,14Z,17Z)-icosatetraenoyl]-2-icosanoyl-sn-glycero-3-phospho-1D-myo-inositol		.	.			.	.		0.3087[-0.0271,0.6444]	2.5527	0.0631		0.1834[-0.9750,1.3295]	0.4896	0.658			.	.			.	.		0.2001[-0.2755,0.6756]	1.1682	0.3076		0.1622[-1.4435,1.7310]	0.2882	0.7919
3a,7b,21-Trihydroxy-5b-cholanoic acid	0.6459[-0.5706,1.8624]	1.4741	0.2145		-0.0733[-0.6047,0.4582]	-0.3004	0.769			.	.			.	.		0.5557[-0.8292,1.9407]	1.1141	0.3277		0.0981[-0.4301,0.6263]	0.4048	0.6927			.	.			.	.
3-Hydroxylidocaine	-0.4764[-1.4651,0.5123]	-1.3379	0.2519			.	.		-0.2563[-0.7413,0.2287]	-1.4674	0.2162		.[.,.]	.	.		-0.1627[-1.3899,1.0644]	-0.3682	0.7314			.	.		-0.0904[-0.6859,0.5051]	-0.4213	0.6952		.[.,.]	.	.
3-keto Fusidic acid		.	.		-0.0650[-0.6012,0.4712]	-0.264	0.7963		0.2834[-0.2310,0.7979]	1.5296	0.2009		0.4306[-0.3642,1.2253]	1.5042	0.207			.	.		0.2799[-0.2264,0.7862]	1.2044	0.2517		-0.0113[-0.6664,0.6437]	-0.0481	0.9639		0.3869[-0.9016,1.6754]	0.8337	0.4513
4E,15Z-Bilirubin IXa	0.7547[-0.7835,2.2929]	1.3623	0.2448		0.3223[-0.1599,0.8045]	1.4562	0.171		0.0817[-0.5251,0.6885]	0.3738	0.7275		0.1372[-1.0049,1.2794]	0.3336	0.7555		0.4214[-1.4412,2.2840]	0.6281	0.564		0.2180[-0.2851,0.7211]	0.944	0.3638		-0.2270[-0.7662,0.3121]	-1.1691	0.3073		0.6150[-0.7681,1.9981]	1.2346	0.2846
5,10-dihydrophenazine-1-carboxylic acid	0.9038[-0.4875,2.2951]	1.8036	0.1456		-0.2140[-0.8909,0.4629]	-0.6888	0.504			.	.			.	.		0.7194[-0.9733,2.4121]	1.18	0.3034		-0.1629[-0.8432,0.5174]	-0.5217	0.6114			.	.			.	.
5b-Cyprinol sulfate	-0.4159[-1.9917,1.1599]	-0.7328	0.5043		0.0181[-0.5825,0.6187]	0.0658	0.9486			.	.			.	.		-0.1030[-1.8577,1.6517]	-0.1629	0.8785		0.0325[-0.5660,0.6310]	0.1184	0.9077			.	.			.	.
6,7-dihydro-12-epi-LTB4	0.4805[-0.5539,1.5149]	1.2897	0.2667		0.1193[-0.4067,0.6453]	0.4941	0.6301		-0.0748[-0.7383,0.5886]	-0.3131	0.7698		0.1427[-0.7429,1.0282]	0.4472	0.6779		0.3122[-0.9041,1.5284]	0.7126	0.5155		0.3602[-0.1185,0.8390]	1.6394	0.1271		0.1298[-0.5253,0.7849]	0.5501	0.6115		-0.0452[-1.3175,1.2270]	-0.0987	0.9261
7,9-Tetracosanedione		.	.			.	.		0.1964[-0.3183,0.7111]	1.0594	0.3492		-0.6663[-2.0138,0.7255]	-1.4966	0.2314			.	.			.	.		-0.0276[-0.6157,0.5604]	-0.1305	0.9025		-1.0054[-2.6900,0.9073]	-1.5772	0.2129
Acetaminophen cystein		.	.			.	.		0.3113[-0.0161,0.6388]	2.6398	0.0576		-0.3415[-1.2933,0.6331]	-1.0907	0.3552			.	.			.	.		0.0723[-0.4670,0.6116]	0.372	0.7287		-0.4968[-1.7385,0.8576]	-1.0798	0.3593
Acrimarine H	0.2788[-1.2482,1.8059]	0.507	0.6388		-0.3525[-1.0056,0.3005]	-1.1763	0.2623		-0.1850[-1.0867,0.7168]	-0.5695	0.5995		0.3037[-0.6627,1.2701]	0.8725	0.4322		0.0340[-1.6179,1.6859]	0.0571	0.9572		-0.2090[-0.8838,0.4658]	-0.6748	0.5126		-0.6705[-0.8528,-0.4882]	-10.213	0.0005	*	0.4049[-0.9642,1.7741]	0.8211	0.4577
alpha-Neu5Ac-(2->3)-beta-D-Gal-(1->4)-beta-D-Glc-(1<->1')-Cer(d18:1/21:0)		.	.			.	.		0.3076[-0.0870,0.7021]	2.1642	0.0964		0.0448[-1.0171,1.1038]	0.1301	0.9047			.	.			.	.		0.1342[-0.4237,0.6920]	0.6677	0.5409		-0.1166[-1.5199,1.3131]	-0.2323	0.8312
Androstenol		.	.		0.0038[-0.6605,0.6681]	0.0126	0.9902		0.2424[-0.6163,1.1011]	0.7838	0.477		0.0852[-0.7774,0.9478]	0.2743	0.7974			.	.		-0.4592[-1.0551,0.1368]	-1.6788	0.119		-0.0362[-0.9679,0.8954]	-0.108	0.9192		0.0256[-1.1961,1.2473]	0.0582	0.9564
Aurovertin B		.	.			.	.		0.1804[-0.4104,0.7713]	0.8478	0.4443		-0.4782[-1.3515,0.4268]	-1.6547	0.1966			.	.			.	.		-0.1624[-0.7712,0.4465]	-0.7405	0.5001		-0.6558[-1.8423,0.6795]	-1.4673	0.2386
Benzoyl meso-tartaric acid	0.1542[-1.9499,2.2583]	0.2034	0.8487		-0.0556[-0.7447,0.6335]	-0.1759	0.8633		-0.0824[-0.8154,0.6507]	-0.312	0.7706		0.3332[-0.7267,1.3931]	0.8729	0.432		0.2249[-1.9716,2.4214]	0.2843	0.7903		0.0294[-0.6582,0.7169]	0.0931	0.9273		-0.2690[-0.9201,0.3820]	-1.1472	0.3152		0.5416[-0.8972,1.9804]	1.045	0.355
Bilirubin		.	.		-0.2132[-0.8334,0.4071]	-0.7489	0.4683		0.1707[-0.3511,0.6924]	0.9082	0.4152		0.0474[-1.2381,1.3328]	0.1023	0.9235			.	.		-0.3220[-0.9213,0.2773]	-1.1705	0.2645		-0.0571[-0.6313,0.5172]	-0.276	0.7962		0.1990[-1.5865,1.9846]	0.3095	0.7724
Biliverdin :: Pyrroles :: Polar Metabolites :: 3-[(2Z,5Z)-2-[[3-(2-carboxyethyl)-5-[(Z)-(3-ethenyl-4-methyl-5-oxopyrrol-2-ylidene)methyl]-4-methyl-1H-pyrrol-2-yl]methylidene]-5-[(4-ethenyl-3-methyl-5-oxopyrrol-2-yl)methylidene]-4-methylpyrrol-3-yl]propanoic acid		.	.			.	.		-0.2781[-0.7921,0.2359]	-1.5024	0.2074		0.8725[0.2093,1.5358]	3.6524	0.0217	*		.	.			.	.		0.2944[-0.2114,0.8003]	1.6159	0.1814		1.2771[0.4930,2.0611]	4.5223	0.0106	*
CDP-DG(18:0/18:2(9Z,12Z))	-0.7244[-2.5254,1.0767]	-1.1167	0.3267		0.0041[-0.5580,0.5663]	0.016	0.9875			.	.			.	.		-0.9605[-2.6647,0.7438]	-1.5647	0.1927		0.1193[-0.4360,0.6746]	0.468	0.6482			.	.			.	.
Cinnamyl cinnamate		.	.		0.1131[-0.5407,0.7669]	0.3769	0.7128		0.3424[-0.0004,0.6853]	2.7729	0.0502		0.3014[-0.5444,1.1472]	0.9893	0.3785			.	.		0.0018[-0.6538,0.6574]	0.006	0.9953		0.0675[-0.5180,0.6530]	0.32	0.765		0.2215[-1.0670,1.5100]	0.4773	0.658
Cyanidin 3-(4-acetylglucoside)	0.7011[-0.9012,2.3035]	1.2149	0.2912		-0.3684[-0.9551,0.2184]	-1.3679	0.1964			.	.			.	.		0.6504[-1.0968,2.3976]	1.0335	0.3597		-0.2018[-0.8177,0.4141]	-0.7139	0.489			.	.			.	.
Cyanidin 3-(diferuloylsophoroside) 5-glucoside	-0.4473[-1.6327,0.7381]	-1.0477	0.3539		0.2585[-0.2391,0.7562]	1.132	0.2797		-0.3748[-0.8320,0.0824]	-2.2758	0.0852		.[.,.]	.	.		-0.2066[-1.5808,1.1675]	-0.4175	0.6977		0.4611[0.0272,0.8950]	2.3153	0.0391	*	0.0898[-0.5998,0.7794]	0.3616	0.736		.[.,.]	.	.
Cyclizine	0.3221[-2.0105,2.6547]	0.3834	0.7209			.	.		0.0038[-0.8092,0.8167]	0.0129	0.9903		-0.2430[-1.8700,1.3840]	-0.4147	0.6996		-0.6750[-2.9836,1.6336]	-0.8118	0.4625			.	.		-0.3240[-1.0126,0.3645]	-1.3066	0.2614		0.0909[-2.2381,2.4200]	0.1084	0.9189
Dehydroepiandrosterone sulfate	0.0234[-1.5442,1.5910]	0.0414	0.969		-0.3327[-0.8562,0.1907]	-1.3851	0.1912			.	.			.	.		-0.0112[-1.6559,1.6335]	-0.0189	0.9858		-0.1715[-0.7230,0.3800]	-0.6776	0.5109			.	.			.	.
Desglucocheirotoxin		.	.		-0.1041[-0.6257,0.4174]	-0.4351	0.6712		0.1328[-0.6465,0.9121]	0.4732	0.6607		0.0728[-1.2277,1.3733]	0.1554	0.884			.	.		-0.4695[-0.9024,-0.0366]	-2.3632	0.0358	*	-0.1575[-0.9376,0.6226]	-0.5607	0.6049		-0.0532[-1.8827,1.7763]	-0.0808	0.9395
DG(18:4(6Z,9Z,12Z,15Z)/22:2(13Z,16Z)/0:0)		.	.			.	.		0.2537[-0.1613,0.6686]	1.6974	0.1649		-0.2512[-1.3044,0.8188]	-0.7279	0.5193			.	.			.	.		0.1456[-0.3665,0.6577]	0.7894	0.4741		-0.3916[-1.7572,1.0627]	-0.7837	0.4904
DG(20:5(5Z,8Z,11Z,14Z,17Z)/24:1(15Z)/0:0)		.	.			.	.		0.2370[-0.1912,0.6653]	1.5367	0.1992		-0.0144[-1.1230,1.0952]	-0.0398	0.9707			.	.			.	.		0.1767[-0.3116,0.6649]	1.0047	0.3719		-0.1666[-1.6137,1.3183]	-0.3206	0.7696
Dihydropteridine		.	.		-0.7592[-1.3535,-0.1648]	-2.7832	0.0166	*	-0.2315[-0.6939,0.2308]	-1.3902	0.2368		0.4015[-0.5136,1.3166]	1.2182	0.2901			.	.		-0.9077[-1.4093,-0.4061]	-3.943	0.002	*	0.2241[-0.2531,0.7013]	1.3039	0.2622		0.3904[-1.0127,1.7934]	0.7725	0.4829
Dipyridamole		.	.		-0.6330[-1.2349,-0.0311]	-2.2914	0.0408	*	0.0778[-0.6091,0.7648]	0.3145	0.7689		-0.0801[-0.9785,0.8183]	-0.2476	0.8166			.	.		-0.7866[-1.3088,-0.2643]	-3.2814	0.0066	*	-0.0448[-0.7456,0.6560]	-0.1775	0.8677		-0.2824[-1.4911,0.9264]	-0.6486	0.552
Formula C10H17OP		.	.		0.5649[0.0820,1.0477]	2.5489	0.0255	*	0.1849[-0.4645,0.8343]	0.7906	0.4734		-0.5019[-2.4388,1.4684]	-0.7904	0.487			.	.		0.5129[0.0098,1.0159]	2.2214	0.0463	*	0.2311[-0.3983,0.8605]	1.0193	0.3657		0.0673[-2.8241,2.9434]	0.0658	0.9517
Formula C10H20O		.	.			.	.		0.1983[-0.2889,0.6855]	1.1301	0.3216		-0.0702[-1.1656,1.0299]	-0.1967	0.8566			.	.			.	.		0.1688[-0.3465,0.6841]	0.9095	0.4145		-0.1970[-1.6242,1.2750]	-0.3834	0.727
Formula C14H26N4O8	-0.0345[-1.4750,1.4060]	-0.0665	0.9502		-0.2644[-0.8855,0.3567]	-0.9277	0.3719		0.0425[-0.8364,0.9215]	0.1343	0.8997		0.3531[-0.5023,1.2084]	1.146	0.3157		-0.3706[-1.7923,1.0511]	-0.7238	0.5093		-0.1454[-0.7798,0.4890]	-0.4994	0.6265		-0.1297[-1.0025,0.7431]	-0.4126	0.701		0.3730[-0.9103,1.6564]	0.8071	0.4649
Formula C15H20O18S		.	.		0.1865[-0.4258,0.7989]	0.6637	0.5194		-0.1104[-0.8510,0.6303]	-0.4137	0.7003		0.3923[-0.6998,1.4583]	1.1185	0.3449			.	.		-0.0544[-0.6750,0.5662]	-0.191	0.8518		-0.2123[-0.9184,0.4939]	-0.8346	0.4509		0.5448[-0.9976,1.9636]	1.0381	0.3755
Formula C15H24O11P2		.	.			.	.		0.1924[-0.3080,0.6929]	1.0675	0.3459		0.2316[-0.9060,1.3538]	0.6306	0.5731			.	.			.	.		0.2782[-0.1464,0.7027]	1.8191	0.143		0.2466[-1.3467,1.7839]	0.4444	0.6868
Formula C15H27N3O17	-0.4332[-2.4119,1.5455]	-0.6078	0.5761		0.0690[-0.5164,0.6544]	0.2568	0.8017			.	.			.	.		-0.4780[-2.5434,1.5874]	-0.6426	0.5555		-0.2085[-0.7788,0.3617]	-0.7967	0.4411			.	.			.	.
Formula C16H32N4O5	0.1561[-1.0805,1.3927]	0.3504	0.7437		0.3752[-0.1182,0.8687]	1.6567	0.1235		0.3956[-0.3568,1.1480]	1.4598	0.2181		0.1002[-1.0200,1.2136]	0.2759	0.8005		0.2997[-0.9499,1.5492]	0.6658	0.542		0.2648[-0.2544,0.7840]	1.1114	0.2882		0.3107[-0.5271,1.1486]	1.0298	0.3613		-0.0772[-1.5830,1.4462]	-0.1438	0.8948
Formula C18H19N2O15P		.	.		0.2482[-0.4594,0.9558]	0.7642	0.4595		0.4540[0.1045,0.8036]	3.6062	0.0226	*	0.5155[-0.7305,1.7272]	1.2906	0.2873			.	.		-0.1284[-0.8462,0.5895]	-0.3896	0.7037		-0.0050[-0.7342,0.7241]	-0.0192	0.9856		0.6487[-1.1925,2.3428]	1.0355	0.3766
Formula C19H36N2O9P2	0.7288[-0.2653,1.7230]	2.0355	0.1115		0.7185[0.3144,1.1225]	3.8743	0.0022	*		.	.			.	.		0.6433[-0.5469,1.8335]	1.5007	0.2078		0.6610[0.2224,1.0995]	3.2839	0.0065	*		.	.			.	.
Formula C19H38O4P2	0.5896[-1.4627,2.6419]	0.7976	0.4698			.	.		0.0566[-0.8366,0.9499]	0.1761	0.8688		0.2697[-0.5460,1.0854]	0.918	0.4106		-0.2354[-2.5300,2.0592]	-0.2849	0.7899			.	.		-0.1250[-1.0154,0.7654]	-0.3898	0.7165		0.2324[-0.9854,1.4503]	0.5299	0.6242
Formula C20H32O14		.	.		-0.0267[-0.5871,0.5337]	-0.1038	0.919		-0.1383[-0.9510,0.6745]	-0.4723	0.6613		-0.0162[-1.2205,1.1892]	-0.0413	0.9696			.	.		-0.0243[-0.5830,0.5344]	-0.0947	0.9261		0.0072[-0.8376,0.8520]	0.0237	0.9822		-0.2479[-1.7883,1.3488]	-0.4459	0.6859
Formula C20H32O6S	0.3793[-1.0919,1.8505]	0.7158	0.5137		0.5095[0.0762,0.9429]	2.5621	0.0249	*		.	.			.	.		0.4984[-0.9875,1.9844]	0.9313	0.4044		0.5098[0.0786,0.9409]	2.5762	0.0243	*		.	.			.	.
Formula C20H40O6		.	.			.	.		0.2692[-0.1270,0.6655]	1.8866	0.1323		-0.1669[-1.2193,0.8965]	-0.4855	0.6606			.	.			.	.		0.1546[-0.3530,0.6621]	0.8455	0.4454		-0.3469[-1.6716,1.0566]	-0.7174	0.5249
Formula C21H34O4P2	-0.0787[-1.6873,1.5298]	-0.1359	0.8985		-0.3173[-0.9110,0.2763]	-1.1646	0.2668		-0.0713[-1.1836,1.0410]	-0.178	0.8674		0.1916[-0.6735,1.0568]	0.6149	0.5719		-0.5310[-2.0532,0.9912]	-0.9686	0.3876		-0.1888[-0.8018,0.4241]	-0.6713	0.5148		-0.5011[-1.3913,0.3890]	-1.5631	0.1931		0.2388[-0.9878,1.4653]	0.5404	0.6176
Formula C22H32N4O4S2	0.2617[-0.9316,1.4549]	0.6088	0.5755		0.3754[-0.1220,0.8729]	1.6443	0.126		0.4056[-0.1417,0.9528]	2.0576	0.1087		0.1128[-1.0125,1.2306]	0.3095	0.7772		0.4996[-0.6098,1.6091]	1.2504	0.2793		0.2980[-0.2179,0.8139]	1.2585	0.2321		0.2940[-0.3875,0.9754]	1.1976	0.2972		-0.0721[-1.5906,1.4627]	-0.1333	0.9024
Formula C22H44O6		.	.			.	.		0.2686[-0.1230,0.6602]	1.9045	0.1296		-0.1339[-1.1935,0.9347]	-0.387	0.7246			.	.			.	.		0.1543[-0.3492,0.6577]	0.8507	0.4428		-0.2940[-1.6455,1.1242]	-0.599	0.5914
Formula C24H47N2OP	-0.1342[-1.7439,1.4755]	-0.2315	0.8283		0.0097[-0.5762,0.5956]	0.0361	0.9718			.	.			.	.		0.2429[-1.4232,1.9089]	0.4047	0.7064		0.1143[-0.4653,0.6940]	0.4297	0.675			.	.			.	.
Formula C25H48O6P2	-0.0616[-1.3991,1.2759]	-0.1279	0.9044		-0.1343[-0.7207,0.4522]	-0.4988	0.6269		0.2226[-0.4605,0.9056]	0.9048	0.4168		0.3395[-0.5323,1.2114]	1.0813	0.3404		0.0630[-1.3402,1.4662]	0.1247	0.9068		-0.0054[-0.5960,0.5853]	-0.0198	0.9846		0.2397[-0.4419,0.9212]	0.9763	0.3842		0.3678[-0.9264,1.6620]	0.7891	0.4742
Formula C26H46N2OP2		.	.			.	.		0.2755[-0.1495,0.7006]	1.7998	0.1463		-0.2489[-1.3002,0.8190]	-0.7227	0.5221			.	.			.	.		0.1244[-0.4277,0.6765]	0.6257	0.5654		-0.4587[-1.7567,0.9433]	-0.9588	0.4084
Formula C26H46N4O2		.	.			.	.		-0.0614[-0.6893,0.5664]	-0.2717	0.7993		-0.1793[-1.3977,1.0510]	-0.4506	0.6828			.	.			.	.		0.4109[0.1184,0.7034]	3.9	0.0175	*	-0.4631[-1.9342,1.1131]	-0.8576	0.4542
Formula C32H54O10P2		.	.			.	.		0.2813[-0.1023,0.6650]	2.0361	0.1114		-0.0345[-1.1171,1.0504]	-0.0979	0.9282			.	.			.	.		0.1329[-0.3893,0.6551]	0.7068	0.5187		-0.1978[-1.5981,1.2474]	-0.3922	0.7211
Formula C32H65O11P		.	.			.	.		0.2980[-0.0685,0.6645]	2.2574	0.0869		-0.1249[-1.2016,0.9602]	-0.3555	0.7458			.	.			.	.		0.1055[-0.4341,0.6451]	0.5428	0.6161		-0.3456[-1.6783,1.0655]	-0.7107	0.5285
Formula C52H86N2O14		.	.			.	.		0.2733[-0.1157,0.6623]	1.9505	0.1229		0.0278[-1.0683,1.1222]	0.0782	0.9426			.	.			.	.		0.1704[-0.3258,0.6666]	0.9534	0.3944		-0.0755[-1.5352,1.4013]	-0.1452	0.8938
Formula C5H6N4O4		.	.		0.3211[-0.1708,0.8129]	1.4223	0.1804		-0.2338[-0.7309,0.2634]	-1.3057	0.2617		-0.2142[-1.3710,0.9568]	-0.5663	0.6108			.	.		0.0244[-0.5054,0.5542]	0.1004	0.9217		0.2201[-0.2971,0.7372]	1.1814	0.3029		0.1605[-1.4824,1.7670]	0.2787	0.7985
Formula C62H105O15P		.	.			.	.		0.2566[-0.1886,0.7018]	1.6002	0.1848		-0.1329[-1.2044,0.9474]	-0.3801	0.7292			.	.			.	.		0.1061[-0.4516,0.6638]	0.5281	0.6254		-0.3912[-1.6829,0.9892]	-0.8261	0.4693
Formula C66H113O15P		.	.			.	.		0.3040[-0.0870,0.6950]	2.159	0.097		0.0430[-1.0215,1.1046]	0.1244	0.9089			.	.			.	.		0.1379[-0.4118,0.6875]	0.6963	0.5246		-0.1033[-1.5139,1.3308]	-0.2048	0.8508
Formula C9H10N2O5		.	.			.	.		0.1850[-0.3228,0.6928]	1.0117	0.3689		0.2094[-0.9582,1.3630]	0.555	0.6176			.	.			.	.		0.2775[-0.1503,0.7053]	1.8008	0.1461		0.1903[-1.4396,1.7770]	0.3338	0.7605
Fulvestrant		.	.		0.0451[-0.4974,0.5876]	0.181	0.8594		0.3450[0.0602,0.6297]	3.3639	0.0282	*	0.5304[-0.3998,1.4606]	1.583	0.1886			.	.		-0.2260[-0.7486,0.2965]	-0.9424	0.3646		-0.0273[-0.5896,0.5351]	-0.1346	0.8995		0.9284[-0.1261,1.9830]	2.4445	0.0709
GPEtn(24:4/26:2)		.	.			.	.		-0.2752[-0.9723,0.4219]	-1.0961	0.3346		0.5912[0.1020,1.0410]	3.8741	0.0304	*		.	.			.	.		0.2105[-0.5387,0.9598]	0.7801	0.4789		0.6863[-0.4592,1.6761]	1.8137	0.1674
Hexyl decanoate		.	.			.	.		0.3344[0.0259,0.6430]	3.0092	0.0396	*	-0.2253[-1.4202,0.9845]	-0.5766	0.6046			.	.			.	.		0.0848[-0.4667,0.6363]	0.4268	0.6915		-0.5275[-1.9380,1.0027]	-1.0121	0.386
Histidinyl-Glycine	0.0547[-1.3360,1.4453]	0.1092	0.9183		-0.0333[-0.5727,0.5062]	-0.1343	0.8954		-0.0439[-0.7414,0.6536]	-0.1746	0.8699		0.0394[-1.1874,1.2662]	0.0891	0.9333		0.5978[-0.6046,1.8002]	1.3804	0.2396		-0.3376[-0.8321,0.1569]	-1.4875	0.1627		-0.0686[-0.7705,0.6333]	-0.2713	0.7996		0.2491[-1.4397,1.9379]	0.4095	0.7031
Histidinyl-Hydroxyproline	-0.7079[-1.8682,0.4524]	-1.6939	0.1655		-0.7222[-1.3239,-0.1206]	-2.6154	0.0226	*	0.1747[-0.5162,0.8656]	0.7019	0.5214		-0.4469[-1.3862,0.4924]	-1.3209	0.257		-0.7987[-1.9454,0.3481]	-1.9337	0.1253		-0.8708[-1.3854,-0.3562]	-3.687	0.0031	*	-0.3191[-0.9128,0.2747]	-1.4919	0.21		-0.6656[-1.9474,0.6163]	-1.4416	0.2229
Isoleucyl-Phenylalanine		.	.		-0.0108[-0.5599,0.5382]	-0.0431	0.9664		0.2485[-0.1805,0.6774]	1.6084	0.183		0.0183[-1.1018,1.1383]	0.0452	0.9661			.	.		0.1685[-0.3685,0.7056]	0.6838	0.5071		0.0366[-0.5180,0.5911]	0.1831	0.8636		0.0023[-1.5704,1.5749]	0.004	0.997
Isosilybin	0.5187[-0.5510,1.5884]	1.3464	0.2494			.	.		-0.5938[-1.0613,-0.1263]	-3.5266	0.0243	*	0.1537[-0.7884,1.0959]	0.453	0.674		0.4849[-0.6884,1.6582]	1.1475	0.3151			.	.		0.1542[-0.7803,1.0888]	0.4582	0.6706		0.3727[-0.8808,1.6261]	0.8255	0.4555
Kanzonol F	1.1698[-0.8837,3.2233]	1.5816	0.1889			.	.		0.0365[-0.7972,0.8702]	0.1217	0.909		0.2056[-0.6925,1.1036]	0.6355	0.5597		1.5224[-0.2314,3.2762]	2.4101	0.0736			.	.		-0.1446[-0.9654,0.6762]	-0.4891	0.6504		0.2655[-1.0049,1.5358]	0.5802	0.5929
L-Carnitine	-0.1187[-1.3032,1.0658]	-0.2783	0.7946		0.3858[-0.2247,0.9963]	1.3769	0.1937		0.2861[-0.1235,0.6957]	1.9392	0.1245		-0.3180[-1.0880,0.4520]	-1.1467	0.3154		-0.3038[-1.4853,0.8778]	-0.7138	0.5148		-0.0149[-0.6697,0.6400]	-0.0495	0.9613		0.2626[-0.1848,0.7101]	1.6296	0.1785		-0.4823[-1.5331,0.5684]	-1.2744	0.2715
lehualide H	0.8229[-0.2375,1.8834]	2.1546	0.0975		0.8467[0.4644,1.2291]	4.825	0.0004	*		.	.			.	.		0.7151[-0.5842,2.0144]	1.5281	0.2012		0.8800[0.5324,1.2275]	5.5167	0.0001	*		.	.			.	.
Linocinnamarin		.	.		0.2769[-0.3246,0.8785]	1.003	0.3357		0.0128[-0.5910,0.6167]	0.059	0.9558		-0.4358[-1.8705,0.9989]	-0.8434	0.4465			.	.		0.1824[-0.4312,0.7961]	0.6477	0.5294		-0.0639[-0.6686,0.5408]	-0.2934	0.7838		-0.0086[-2.1942,2.1770]	-0.011	0.9918
L-isoleucyl-L-proline	-0.4223[-1.5870,0.7425]	-1.0065	0.3711		0.2312[-0.2887,0.7510]	0.9689	0.3517			.	.			.	.		-0.4534[-1.6679,0.7610]	-1.0367	0.3584		-0.1008[-0.6351,0.4336]	-0.4108	0.6884			.	.			.	.
Lucidenic acid G		.	.			.	.		0.2281[-0.4598,0.9160]	0.9208	0.4093		0.4226[-0.5570,1.4022]	1.1978	0.2971			.	.			.	.		-0.2982[-0.9429,0.3465]	-1.2842	0.2684		0.7810[-0.3995,1.9615]	1.8369	0.1401
LysoPC(18:3(9Z,12Z,15Z))	-0.1899[-3.2097,2.8300]	-0.1746	0.8699		-0.0732[-0.5944,0.4479]	-0.3062	0.7647			.	.			.	.		0.1921[-2.9766,3.3608]	0.1683	0.8745		0.0620[-0.4581,0.5820]	0.2596	0.7996			.	.			.	.
LysoPE(0:0/20:1(11Z))	0.0739[-2.6207,2.7684]	0.0761	0.943		-0.2249[-0.7318,0.2820]	-0.9666	0.3528			.	.			.	.		0.5998[-2.1036,3.3032]	0.616	0.5712		-0.3067[-0.7946,0.1812]	-1.3696	0.1959			.	.			.	.
Mammea A/AB cyclo F	-0.1999[-1.6171,1.2173]	-0.3916	0.7153		0.4270[-0.0258,0.8798]	2.0546	0.0624		0.0605[-0.5347,0.6557]	0.2821	0.7918		0.1211[-0.7702,1.0124]	0.3772	0.7252		-0.0973[-1.6062,1.4116]	-0.179	0.8666		0.3733[-0.0960,0.8427]	1.733	0.1087		0.0486[-0.5557,0.6530]	0.2234	0.8342		-0.0494[-1.3207,1.2219]	-0.1079	0.9193
mesulergine	0.4838[-1.1161,2.0837]	0.8396	0.4484		-0.3777[-0.9476,0.1922]	-1.4439	0.1744		0.0010[-0.8298,0.8318]	0.0033	0.9975		0.2468[-0.6257,1.1193]	0.7855	0.4761		0.0947[-1.7207,1.9102]	0.1449	0.8918		-0.1860[-0.7903,0.4183]	-0.6706	0.5151		-0.0983[-0.9276,0.7311]	-0.329	0.7587		0.3649[-0.8496,1.5793]	0.8342	0.4511
Metipranolol		.	.			.	.		0.2184[-0.4041,0.8408]	0.9741	0.3852		0.5942[-0.2792,1.4676]	1.889	0.1319			.	.			.	.		-0.1391[-0.8124,0.5342]	-0.5736	0.5969		1.1014[0.3899,1.8128]	4.2982	0.0127	*
MG(24:6(6Z,9Z,12Z,15Z,18Z,21Z)/0:0/0:0)	-0.1485[-1.8173,1.5204]	-0.247	0.8171		0.0452[-0.6348,0.7253]	0.145	0.8871		-0.1419[-0.8520,0.5682]	-0.5547	0.6087		0.5071[-0.2608,1.2749]	1.8336	0.1406		0.5591[-1.0248,2.1431]	0.9801	0.3825		0.0643[-0.6130,0.7417]	0.207	0.8395		-0.1881[-0.8864,0.5103]	-0.7477	0.4962		0.6246[-0.5529,1.8020]	1.4727	0.2148
Misoprostol	0.5341[-0.4798,1.5479]	1.4625	0.2174		0.1414[-0.4081,0.6908]	0.5606	0.5854		0.0952[-0.5804,0.7708]	0.3914	0.7155		0.2033[-0.6737,1.0804]	0.6436	0.5548		0.3223[-0.9170,1.5616]	0.722	0.5102		0.4584[-0.0157,0.9324]	2.1068	0.0569		0.0494[-0.6437,0.7424]	0.1978	0.8528		0.0339[-1.2586,1.3264]	0.0728	0.9455
N,N'-Bis(g-glutamyl)-3,3'-(1,2-propylenedithio)dialanine	0.3805[-0.7331,1.4941]	0.9487	0.3965		-0.3369[-0.8732,0.1994]	-1.3687	0.1962		-0.1755[-1.0313,0.6803]	-0.5694	0.5995		0.2370[-0.8404,1.3144]	0.6107	0.5744		0.5049[-0.5815,1.5914]	1.2903	0.2665		-0.2622[-0.8129,0.2885]	-1.0373	0.32		0.0019[-0.8983,0.9021]	0.0058	0.9956		0.4783[-0.9569,1.9135]	0.9252	0.4072
n-butyl oleate		.	.			.	.		0.2126[-0.3662,0.7913]	1.0197	0.3655		-0.0528[-1.1434,1.0413]	-0.1488	0.8912			.	.			.	.		0.0869[-0.5592,0.7330]	0.3734	0.7278		-0.2459[-1.6359,1.1999]	-0.4893	0.6582
Oleamide	-0.4083[-1.5591,0.7426]	-0.985	0.3804			.	.		0.3613[0.1060,0.6166]	3.9296	0.0171	*	-0.0337[-0.8947,0.8274]	-0.1085	0.9188		-0.2605[-1.5567,1.0357]	-0.558	0.6066			.	.		0.1716[-0.3456,0.6887]	0.9211	0.4091		-0.1483[-1.3410,1.0445]	-0.3451	0.7474
Paraxanthine	0.1823[-1.1466,1.5111]	0.3808	0.7227		-0.1226[-0.6681,0.4228]	-0.4899	0.6331		-0.0565[-0.7643,0.6512]	-0.2217	0.8354		-0.1649[-1.0812,0.7513]	-0.4998	0.6434		0.6155[-0.5174,1.7485]	1.5084	0.2059		-0.3754[-0.8711,0.1204]	-1.6496	0.1249		-0.0465[-0.7640,0.6710]	-0.18	0.8659		-0.3636[-1.5895,0.8623]	-0.8234	0.4565
PC(15:0/18:2(9Z,12Z))		.	.			.	.		-0.2961[-1.0231,0.4309]	-1.1308	0.3213		0.2503[-1.0778,1.5618]	0.5835	0.6005			.	.			.	.		0.3281[-0.3834,1.0397]	1.2803	0.2696		0.1857[-1.6824,2.0117]	0.2837	0.7951
PE 36:2 :: Glycerophospholipids :: Lipids :: 2-azaniumylethyl [(2R)-2,3-bis[[(Z)-octadec-9-enoyl]oxy]propyl] phosphate		.	.			.	.		-0.3108[-0.8475,0.2259]	-1.6077	0.1832		-0.1487[-1.1934,0.9060]	-0.4358	0.6925			.	.			.	.		0.2983[-0.2619,0.8585]	1.4786	0.2133		-0.4114[-1.6558,0.9264]	-0.899	0.4349
Pelargonidin 3-O-[b-D-Glucopyranosyl-(1->2)-[4-hydroxycinnamoyl-(->6)]-b-D-glucopyranoside](E-) 5-O-b-D-glucopyranoside	0.6385[-0.8314,2.1083]	1.206	0.2943		-0.2801[-0.9325,0.3724]	-0.9352	0.3681		-0.0587[-1.0480,0.9307]	-0.1646	0.8772		0.3561[-0.5993,1.3114]	1.0348	0.3592		0.6132[-0.9734,2.1998]	1.0731	0.3437		-0.1581[-0.8244,0.5082]	-0.5169	0.6146		-0.2877[-1.2091,0.6338]	-0.8668	0.435		0.5028[-0.8361,1.8417]	1.0427	0.356
Pentasine		.	.			.	.		0.3735[0.1624,0.5847]	4.9117	0.008	*	-0.0834[-1.6079,1.4467]	-0.1679	0.8773			.	.			.	.		0.0750[-0.4817,0.6318]	0.3742	0.7273		-0.1828[-2.2026,1.8785]	-0.2528	0.8168
Physalin M	0.6562[-0.7427,2.0552]	1.3023	0.2627		-0.3721[-0.9150,0.1709]	-1.493	0.1613		-0.0951[-0.9328,0.7426]	-0.3152	0.7683		0.3076[-0.5608,1.1761]	0.9835	0.381		0.6513[-0.8485,2.1511]	1.2057	0.2944		-0.2982[-0.8570,0.2605]	-1.163	0.2674		0.1538[-0.6772,0.9847]	0.5138	0.6345		0.3287[-0.9509,1.6082]	0.7132	0.5151
Physalin P	1.0020[-0.4021,2.4061]	1.9814	0.1186		-0.4916[-1.0794,0.0963]	-1.8219	0.0935		-0.4006[-1.0817,0.2805]	-1.633	0.1778		0.3566[-0.5169,1.2302]	1.1335	0.3203		0.5667[-1.3516,2.4849]	0.8202	0.4582		-0.4222[-1.0287,0.1844]	-1.5165	0.1553		-0.4971[-1.0584,0.0641]	-2.4593	0.0697		0.4225[-0.8592,1.7042]	0.9152	0.4119
PI(16:0/18:1(9Z))		.	.			.	.		-0.3567[-0.9367,0.2233]	-1.7073	0.1629		0.4513[-0.4146,1.2872]	1.6319	0.2012			.	.			.	.		0.2694[-0.4053,0.9442]	1.1087	0.3297		0.2792[-1.2563,1.7514]	0.5239	0.6366
PI(22:0/18:3(9Z,12Z,15Z))		.	.			.	.		0.2604[-0.1492,0.6701]	1.7651	0.1523		-0.1421[-1.2029,0.9282]	-0.4103	0.7091			.	.			.	.		0.2486[-0.1832,0.6804]	1.5984	0.1852		-0.3414[-1.6652,1.0599]	-0.7069	0.5306
pre-putrebactin	0.7304[-1.3532,2.8139]	0.9732	0.3855			.	.		-0.0569[-0.8026,0.6888]	-0.2119	0.8426		0.2884[-0.5677,1.1445]	0.9353	0.4026		0.0665[-2.3625,2.4954]	0.076	0.9431			.	.		-0.0854[-0.8347,0.6639]	-0.3163	0.7676		0.3433[-0.8948,1.5815]	0.7699	0.4843
Promazine 5-sulfoxide	0.0928[-1.4570,1.6425]	0.1662	0.876		0.4759[-0.0707,1.0225]	1.897	0.0822		0.0664[-0.6430,0.7757]	0.2599	0.8078		-0.2557[-1.1076,0.5963]	-0.8332	0.4516		-0.0019[-1.6333,1.6294]	-0.0033	0.9975		0.5481[0.0312,1.0649]	2.3103	0.0395	*	-0.3149[-0.8916,0.2617]	-1.5164	0.204		-0.3826[-1.5642,0.7991]	-0.8989	0.4195
Propionyl-CoA		.	.			.	.		0.1792[-0.3646,0.7230]	0.9148	0.4121		-0.1339[-1.0012,0.7335]	-0.4285	0.6904			.	.			.	.		0.2230[-0.2967,0.7427]	1.1913	0.2994		-0.2584[-1.4508,0.9340]	-0.6016	0.5799
PS(17:1(9Z)/20:1(11Z))		.	.			.	.		-0.0660[-0.8839,0.7518]	-0.2242	0.8336		0.1705[-0.9800,1.3097]	0.4582	0.678			.	.			.	.		0.4807[-0.0170,0.9785]	2.6814	0.0551		-0.2061[-1.7384,1.3729]	-0.3739	0.7333
PS(17:1(9Z)/22:0)		.	.			.	.		0.2602[-0.2529,0.7733]	1.4078	0.2319		0.0221[-1.1054,1.1481]	0.0603	0.9557			.	.			.	.		0.3166[-0.1415,0.7747]	1.9187	0.1275		-0.2936[-1.6979,1.1774]	-0.5762	0.6049
PS(19:0/0:0)		.	.			.	.		0.3699[0.1023,0.6375]	3.8376	0.0185	*	0.0172[-1.2047,1.2379]	0.0432	0.9682			.	.			.	.		0.0429[-0.5399,0.6256]	0.2042	0.8482		-0.0621[-1.6938,1.5837]	-0.1069	0.9216
Ptilosteroid B		.	.			.	.		0.3091[-0.1923,0.8105]	1.7117	0.1621		0.1244[-1.1269,1.3674]	0.3068	0.779			.	.			.	.		0.3220[-0.1741,0.8180]	1.8021	0.1459		-0.1926[-1.8437,1.5022]	-0.3248	0.7666
Pyrophaeophorbide a	0.0892[-1.4279,1.6063]	0.1633	0.8782		-0.1716[-0.9512,0.6079]	-0.4797	0.64		0.0099[-0.6649,0.6846]	0.0406	0.9696		0.5745[-0.5298,1.6788]	1.4443	0.2221		0.6642[-0.6394,1.9678]	1.4146	0.2301		0.0222[-0.7621,0.8066]	0.0618	0.9518		-0.1577[-0.8044,0.4890]	-0.677	0.5355		0.7976[-0.7614,2.3565]	1.4205	0.2285
Sciadonic acid		.	.			.	.		0.3747[-0.0073,0.7567]	2.7234	0.0528		-0.5300[-1.3589,0.3342]	-1.9262	0.1497			.	.			.	.		0.1140[-0.5194,0.7474]	0.4998	0.6435		-0.8055[-1.7972,0.3689]	-2.0984	0.1268
Taurochenodeoxycholic acid 7-sulfate		.	.		-0.1624[-0.9349,0.6101]	-0.4581	0.6551		0.1857[-0.6210,0.9925]	0.6392	0.5574		-0.1001[-1.2675,1.0740]	-0.2631	0.8095			.	.		-0.0692[-0.8447,0.7063]	-0.1944	0.8492		-0.4041[-1.0518,0.2436]	-1.7322	0.1583		-0.1177[-1.6842,1.4754]	-0.2103	0.8469
Taurohyocholate	0.2048[-1.6182,2.0277]	0.3118	0.7707		-0.3850[-0.9864,0.2163]	-1.395	0.1883			.	.			.	.		-0.0035[-1.9389,1.9319]	-0.005	0.9963		-0.0706[-0.7154,0.5741]	-0.2387	0.8153			.	.			.	.
Tetrahexosylceramide (d18:1/18:0)		.	.			.	.		0.3870[0.0480,0.7260]	3.1697	0.0339	*	-0.0915[-1.2254,1.0485]	-0.2476	0.8204			.	.			.	.		0.1506[-0.4572,0.7583]	0.6879	0.5293		-0.2657[-1.7171,1.2460]	-0.506	0.6477
Tomatine	-0.3973[-2.1563,1.3616]	-0.6272	0.5646		0.2297[-0.3296,0.7891]	0.8949	0.3884			.	.			.	.		-0.5774[-2.3372,1.1825]	-0.9109	0.4139		0.2627[-0.2890,0.8144]	1.0373	0.32			.	.			.	.
trans-2-Dodecenoylcarnitine		.	.		-0.0828[-0.6279,0.4623]	-0.3308	0.7465		0.0414[-0.8572,0.9400]	0.128	0.9044		-0.2587[-1.5152,0.9978]	-0.5717	0.5981			.	.		-0.4135[-0.8934,0.0664]	-1.8773	0.085		-0.3903[-1.1226,0.3420]	-1.4799	0.213		0.0393[-1.7943,1.8730]	0.0596	0.9554
Tridecyl phloretate		.	.			.	.		0.3677[0.0363,0.6990]	3.081	0.0369	*	-0.4337[-1.4310,0.5924]	-1.3188	0.2789			.	.			.	.		0.0882[-0.5151,0.6915]	0.4058	0.7057		-0.7425[-1.8655,0.5490]	-1.7353	0.1811
Tussilagonone	-0.5125[-1.5478,0.5229]	-1.3743	0.2413			.	.		-0.0129[-0.6461,0.6203]	-0.0564	0.9577		0.0935[-0.7625,0.9494]	0.3032	0.7769		-0.8232[-1.4794,-0.1671]	-3.4834	0.0253	*		.	.		-0.2887[-0.7888,0.2114]	-1.6027	0.1843		-0.0643[-1.2762,1.1476]	-0.1473	0.89
Tyramine glucuronide	-0.3216[-1.5680,0.9248]	-0.7164	0.5133		0.4825[-0.0268,0.9917]	2.0643	0.0613		-0.1697[-0.7031,0.3638]	-0.8831	0.4271		-0.4098[-1.1411,0.3215]	-1.5558	0.1947		-0.0711[-1.4564,1.3142]	-0.1425	0.8936		0.4918[-0.0118,0.9953]	2.128	0.0548		-0.1845[-0.7160,0.3469]	-0.964	0.3896		-0.6745[-1.5771,0.2282]	-2.0746	0.1067
